# Supplementary material
Source: PubMed Central journal article supplement (PMC3773023)
Supplement: NIHMS488397-supplement-1.pdf [file NIHMS488397-supplement-1.pdf]

## **Supplementary Results**

### **Titration of sgRNA- and Cas9-expressing plasmid amounts used for the EGFP disruption assay**

Single guide RNAs (sgRNAs) were generated for three different sequences (**Supplementary Fig. 2a**) located upstream of *EGFP* nucleotide 502, a position at which the introduction of frameshift mutations via non-homologous end-joining can robustly disrupt expression of EGFP<sup>1, 2</sup>. For each of the three target sites, we initially transfected a range of sgRNA-expressing plasmid amounts (12.5 to 250 ng) together with 750 ng of a plasmid expressing a codon-optimized version of the Cas9 nuclease into our U2OS.EGFP reporter cells bearing a single copy, constitutively expressed *EGFP-PEST* reporter gene. All three RGENs efficiently disrupted EGFP expression at the highest concentration of sgRNA plasmid (250 ng) (**Supplementary Fig. 2b**). However, RGENs for target sites #1 and #3 exhibited equivalent levels of disruption when lower amounts of sgRNA-expressing plasmid were transfected whereas RGEN activity at target site #2 dropped immediately when the amount of sgRNA-expressing plasmid transfected was decreased (**Supplementary Fig. 2b**). We next titrated the amount of Cas9-encoding plasmid (range from 50 ng to 750 ng) transfected into our U2OS.EGFP reporter cells and assayed for EGFP disruption. As shown in **Supplementary Fig. 2c**, target site #1 tolerated a three-fold decrease in the amount of Cas9-encoding plasmid transfected without substantial loss of EGFP disruption activity. However, the activities of RGENs targeting target sites #2 and #3 decreased immediately with a three-fold reduction in the amount of Cas9 plasmid transfected (**Supplementary Fig. 2c**). Based on these results, we used 25ng/250ng, 250ng/750ng, and 200ng/750ng of sgRNA-/Cas9-expressing plasmids for *EGFP* target sites #1, #2, and #3, respectively, for the experiments described in the main text.

We do not understand the reasons why some sgRNA/Cas9 combinations work better than others in disrupting EGFP expression nor do we know why some of these combinations are more or less sensitive to the amount of plasmids used for transfection. Although it is possible that the range of off-target sites present in the genome for these three sgRNAs might influence each of their activities, we did not observe any differences in the numbers of genomic sites that differ by one to six bps for each of these particular target sites (**Supplementary Table 3**) that would account for the differential behavior of the three sgRNAs.

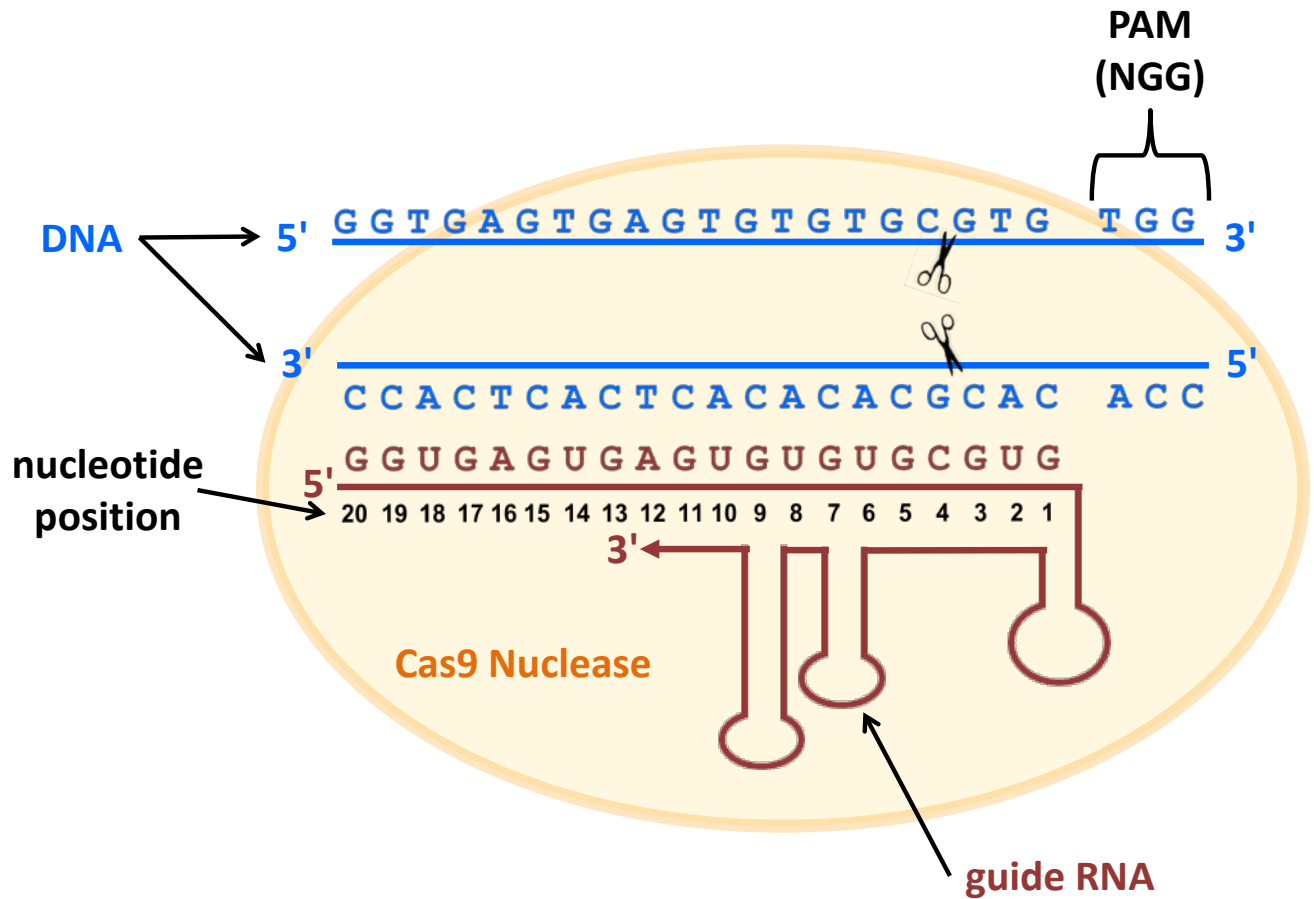

**Supplementary Fig. 1 Schematic illustrating a sgRNA/Cas9 nuclease complex bound to its target DNA site**

Scissors indicate approximate cleavage points of the Cas9 nuclease on the genomic DNA target site. Note the numbering of nucleotides on the guide RNA proceeds in an inverse fashion from 3' to 5'.

- (a) **EGFP Site 1** GGGCACGGGCAGCTTGCCGGTGG  
**EGFP Site 2** GATGCCGTTCTTCTGCTTGTCGG  
**EGFP Site 3** GGTGGTGCAGATGAACTTCAGGG

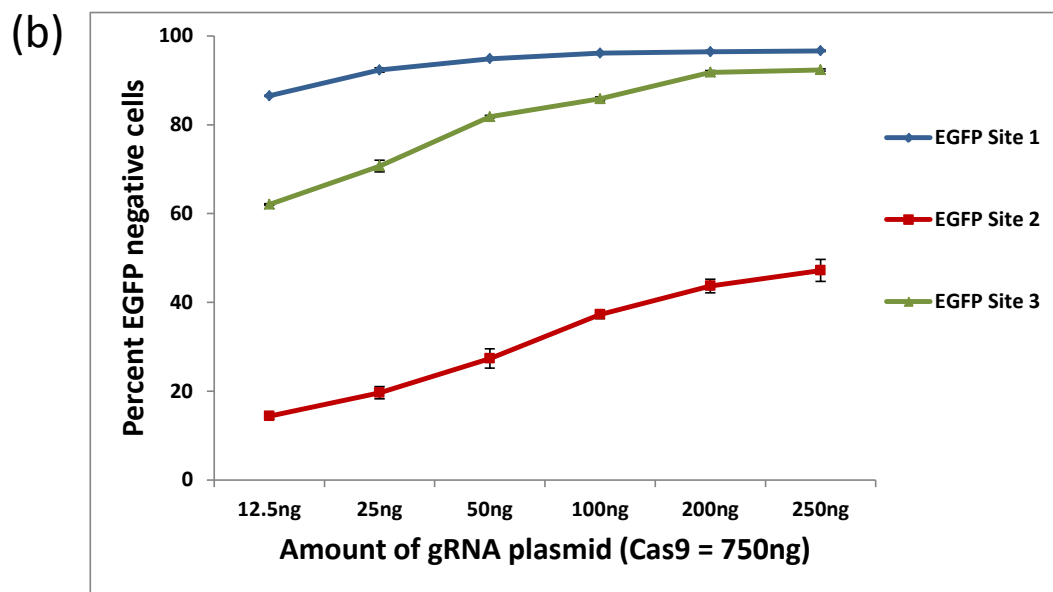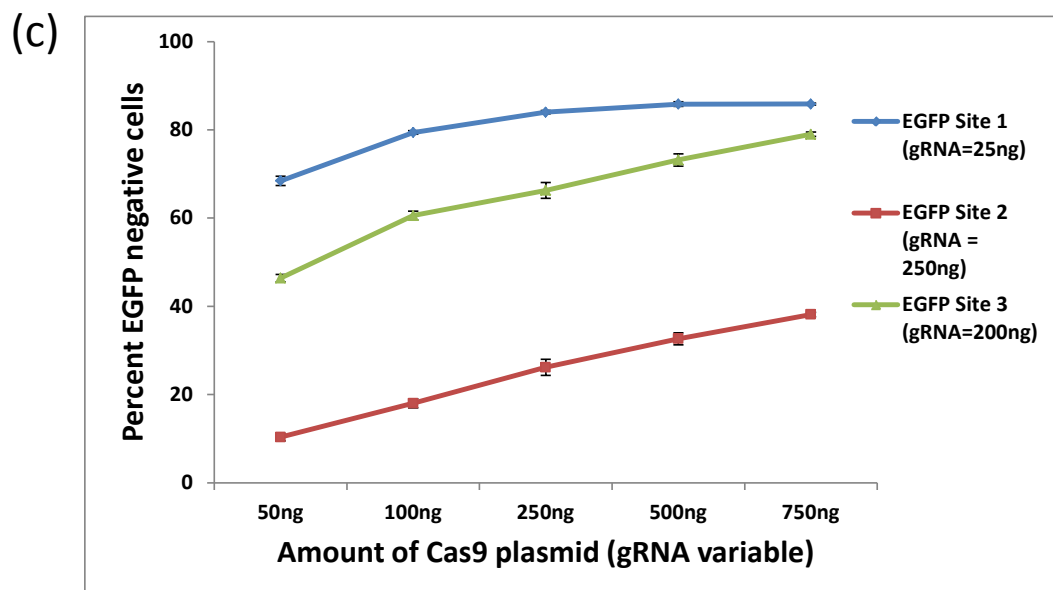

Supplementary Fig. 2 Titration of sgRNA- and Cas9-expressing plasmid amounts used for the human cell-based EGFP disruption assay

(a) Sequences for three RGEN target sites in *EGFP* used in this study. (b) Activities of RGENs in the EGFP disruption assay performed using varying amounts of sgRNA-expressing plasmids. (c) Activities of RGENs in the EGFP disruption assay performed using varying amounts of Cas9-expression plasmid.

**Target 1 (VEGFA Site 1):**

**OT1-3**

AGACAGGACATTCTGACACC**CCAGGAGCAA**ACTCCCTCCATCC**CC**CACAAATCCGTCCTTAGATGTGCA Wild-type x18  
<-----AACTCCCTCCATCCCACAAATCCGTCCTTAGATGTGCA Δ53  
AGACAGGACATTCTGACACC-----CCATCCCACAAATCCGTCCTTAGATGTGCA Δ17  
AGACAGGACATTCTGACACCCAGGA-----CCCACAAATCCGTCCTTAGATGTGCA Δ15  
AGACAGGACATTCTGACACCCAG-----GCAAACCTCCCTCCATCCCACAAATCCGTCCTTAGATGTGCA Δ2

AGACAGGACATTCTGACACCCAGGA**GG**GCAAACCTCCCTCCATCCCACAAATCCGTCCTTAGATGTGCA +2

**OT1-6**

GAGAGAGGCTCCCATCA**CGGGGGAGGGAGTTTGCTCTGG**GGAACCTGTGATCCCCACAGGGAACA Wild-type x87  
GAGAGAGGCTCCCATCACGGGG-----AGGGAACA Δ35 x3  
GAGAGAGGCTCCCATCACGGGGGA-----GGGGAACCTGTGATCCCCACAGGGAACA Δ14 x1

**OT1-11**

TGGACTCTACCCACTGAATG**CCAGGAGCAA**ACTTCCCTCC**CC**GAGTTGTGACAGCAAAAAATGTCTC Wild-type x27  
TGGACTCTACCCACTG-----AATGTCTC Δ43  
TGGACTCTA-----CCCCCCCCGAGTTGTGACAGCAAAAAATGTCTC Δ25  
TGGACTCTAC-----CCCCCCCCGAGTTGTGACAGCAAAAAATGTCTC Δ24  
TGGACTCTACCCACTGAATG-----CCCTCCCCGAGTTGTGACAGCAAAAAATGTCTC Δ15  
TGGACTCTACCCACTGAATG-----CCCTCCCCGAGTTGTGACAGCAAAAAATGTCTC Δ15  
TGGACTCTACCCACTGAAT-----GCAAACCTCCCTCCCCGAGTTGTGACAGCAAAAAATGTCTC Δ7  
TGGACTCTACCCACTGAATGCCAGGA-----TTCCCTCCCCGAGTTGTGACAGCAAAAAATGTCTC Δ6  
TGGACTCTACCCACTGAATGCCTGG-----CATCCCTCCCCGAGTTGTGACAGCAAAAAATGTCTC Δ6  
TGGACTCTACCCACTGAATGCCAGG-----AAACTTCCCTCCCCGAGTTGTGACAGCAAAAAATGTCTC Δ3

TGGACTCTACCCACTGAATGCCAGGAT**GGAAAGATAATTTTTTC**ATAGACCAGGGTGGGGGAATGGTTTCGGGATGATCAAGCACATCAC  
ATTTATTGTGCACTTTATTTCTATTACTATTATATTGTAATGTATACTAAAAATAATTATACAACCTACCAT AATGTAGAACCAGTGGGAG  
CCGCAAACCTCCCTCCCCGAGTTGTGACAGCAAAAAATGTCTCA +158

TGGACTCTACCCACTGAATGCCAGGCAAACCTCCCTCCCCGAGTTGTGACA**GCAAAAAATGTCTGGCCTAATGTCTG**GCAAAAAATGTCTCA  
AGACATTGCCAAATGTCCCCT +23 (Δ2 +25)

**Target 2 (VEGFA Site 2):**

**OT2-2**

ACCCACCTCCCTATCTCAAACCTTGG**CCAGAGGCGGGGTGGAGGGGCC**CTAGGAGCGCCTTGGTG Wild-type x30  
ACCCAC-----CGCCTTGGTG Δ51  
ACCCACCTCC-----TATCCTAGGAGCGCCTTGGTG Δ36  
ACCCACCTCCCTATCTCAAACCTT-----CCCTTGGTG Δ33  
ACCCACCTCCCTATCTCAAACCTTGGCCAGAG-----TAGGAGCGCCTTGGTG Δ18  
ACCCACCTCCCTATCTCAAACCTT-----GGGGTGGAGGGGCCCTAGGAGCGCCTTGGTG Δ10  
ACCCACCTCCCTATCTCAAACCTT-----GGCGGGTGGAGGGGCCCTAGGAGCGCCTTGGTG Δ7  
ACCCACCTCCCTATCTCAAACCTTGGCCAGA-----GTGGAGGGGCCCTAGGAGCGCCTTGGTG Δ6

ACCCACCTCCCTATCTCAAACCT-----  
**CTGGCAGTCTGTCA**GTGCGTTATCTTGTCACTTCTACAAGGGGGCTCTCCCTGCATTCTGA +21 (Δ40, +61)

ACCCACCTCCCTATCTCAAACCTTGGCCAGAG**GGCGCCTCCCCAGGAAGTGCTCCGGCCAGCCAGGGTAAACACGCTAGCCCTGCCCC**  
**CTGGGACCATAGCCCGGGGACCCAGACTCTTGCCACGCTCATTCCAC**CGGGGTGGAGGGGCCCTAGGAGCGCCTTGGTG +108

**OT2-15**

TGACTGTCGGTGCCCCACATGTGGCAGATGC**CCAGAGGCGGGGTGTGGGGGGTA**CTTTGTGGGCGTT Wild-type X71  
TGACTGTC-----GGTGTGGGGGGTACTTTGTGGGCGTT Δ33  
TGACTGTCGGTGCCCCACATGTGGCAGATGCCAGAG-----GGGCGTT Δ23  
TGACTGTCGGTGCCCCACATGTGGCAGAG-----TGTGGGGGGTACTTTGTGGGCGTT Δ15  
TGACTGTCGGTGCCCCACATGT-----GGCGGGGTGTGGGGGGTACTTTGTGGGCGTT Δ14  
TGACTGTCGGTGCCCCACATGTGGCAGATG-----GAGGCGGGGTGTGGGGGGTACTTTGTGGGCGTT Δ4  
TGACTGTCGGTGCCCCACATGTGGCAGATGCCAGAG-----GGGTGTGGGGGGTACTTTGTGGGCGTT Δ4  
TGACTGTCGGTGCCCCACATGTGGCAGATGCCAGAG-----GGGGTGTGGGGGGTACTTTGTGGGCGTT Δ2

TGACTGTCTGGTGTCCCCACATGTGGCAGATGCCAGAGTTGCGGGGTGTGGGGGTACTTTGTGGGCGTT +2  
TGACTGTCTGGTGTCCCCACATGTGGCAGATGCCAGAGCTGCGGGGTGTGGGGGTACTTTGTGGGCGTT +2

**OT2-24**

ACAAGATGACTATGTCCCTCTGGGCCCCATCCTCCCCTCCCCACCCACCCCGCCTCAGGCTTGAAGA Wild-type x8  
ACAAGA-----> Δ121  
<-----CTCAGGCTTGAAGA Δ82  
ACAAGATG-----> Δ80  
<-----> Δ79  
ACAAGATGACTATGTCCCTCTGGGCCCCATCCTCC-----> Δ42  
ACAAGATGACTATGTCCCTCTGGGC-----CTTGAAGA Δ34  
ACAAGATGACTATGTCCCTCTGGGCCCCATCCTCCCCTCCC-----CAGGCTTGAAGA Δ14  
ACAAGATGACTATGTCCCTCTGGGCCCCATCCTCCCCTCC-----CCTCAGGCTTGAAGA Δ12  
ACAAGATGACTATGTCCCTCTGGGCCCCATCCTCCCCTCCCCA-----GCAGGCTTGAAGA Δ11  
ACAAGATGACTATGTCCCTCTGGGCCCCATCCTCCCCTCCCCACCCAC-----CTTGAAGA Δ11  
ACAAGATGACTATGTCCCTCTGGGCCCCATCCTCCCCTCCC-----GCTCAGGCTTGAAGA Δ11

ACAAGATGACTATGTCCCTCTGGGCCCGCCTCAAGTGATCCAGCTGCCTTGGCCTCCAAAAGTGCTAGCAGTACAGATGTGAGCCTCCATG  
CCTGGCCTATTGCAACATCCCATCTCTGTGAAGCAGGGTTTTCTGCAGTGACAGCAAGAAGAGCACAGGGCCAAAAAACTTTGTCTCTTA  
GAAAGGATCTACCTTTTAGGCTGAGAATGGCA +76 (Δ43 +119)

**Target 3 (VEGFA Site 3):**

**OT3-2**

GAGTGAGAGAGCGAGTGAGTGAAGTGAGTGAGTGAGTGAAGTGGGGGGGGACTCGGCTTGTGTGTGTCGG Wild-type x14  
GAGTGAGAGAGCGAGTGAGTGAGTGAGTGA-----GTGTGTGGGGGGGGACTCGGCTTGTGTGTGTCGG Δ4  
GAGTGAGAGAGCGAGTGAGTGAGTGAGTGA-----GTGTGGGGGGGGACTCGGCTTGTGTGTGTCGG Δ6 x2

**OT3-9**

GTGTTGGGATGCGGGAGTGCGGTGAGTGAGTGAGTGAAGTGGGGGGCGATGCAAGCGTGTGCGAATGCGTG x173  
GTGTTGGGATGCGGGA-----> Δ80  
GTGTTGGGATGC-----GCGTG Δ50  
GTGTTGGGATGCGGGAGTGGGTGAGTGA-----GTGGCGATGCAAGCGTGTGCGAATGCGTG Δ10

GTGTTGGGATGCGGGAGTGGGTGAGTGAGTGAAGTGGGGTGGCGATGCAAGCGTGTGCGAATGCGTG +2

**OT3-18**

TTTCAAAGACAGTAGATCTTAAATGTCCTCAGCACACACTCACCCACAATAAAAGGTGGTAACTG Wild-type x27  
TTTCAAAGACAGTAGATCT-----TAAAAGGTGGTAACTG Δ32  
TTTCAAAGACAGTAGATCTTAAATGT-----CATAAAAGGTGGTAACTG Δ23  
TTTCAAAGACAGTAGATCTTAAATGTCTT-----CACATAAAAGGTGGTAACTG Δ18 x4  
TTTCAAAGACAGTAGATCTTAAATGTCTT-----CCACACATAAAAGGTGGTAACTG Δ15  
TTTCAAAGACAGTAGATCTTAAATGTCTT-----CTCACCCACACATAAAAGGTGGTAACTG Δ12  
TTTCAAAGACAGTAGATCTTAAATGTCTTCA-----CACACACTCACCCACACATAAAAGGTGGTAACTG Δ2

TTTCAAAGACAGTAGATCTTAAATGTCTTCAAGGCTGGAGTACAGTGGCATGATATCAGCTCACTGCAATCTCGGGCTCCCGGGTTCAAG  
CCATGCACACACTCACCCACACATAAAAGGTGGTAAAC +63

**Target 4 (EMX1):**

**OT4-1**

ACCTGTACATCTGCACAAGATTGCCTTTACTCCATGCCTTTCTTCTTCTGCTCTAACTCTGACAATC Wild-type x20  
-----ATC Δ64  
ACCTGTACATCTGCACAAGATTGCCTTTACTCC-----ACAATC Δ28  
ACCTGTACATCTGCACAAGATTGCCTTTACTCCAT-----ACTCTGACAATC Δ20  
ACCTGTACATCTGCACAAGATTGC-----CTTCTGCTCTAACTCTGACAATC Δ20  
ACCTGTACATCTGCACAAGATTGCCTTTACTCCATGCCTTTCT-----CAATC Δ19  
ACCTGTACATCTGCACAAGATTGCCTTTACTCCA-----TGCTCTAACTCTGACAATC Δ14  
TCCTGTACATCTGCACAAGATTGCCTTTACTCC-----CTTCTTCTGCTCTAACTCTGACAATC Δ8

**Supplementary Fig. 3 Sequences of off-target indel mutations induced by RGENs in human U2OS.EGFP cells**

Wild-type genomic off-target sites recognized by RGENs (including the PAM sequence) are highlighted in yellow and numbered as in **Table 1** and **Supplementary Table 2**. Note that the complementary strand is shown for some sites. Deleted bases are shown as red dashes on a grey background. Inserted bases are italicized and highlighted in blue.



**Target 1 (VEGFA Site 1):**

**OT1-3**

TCAGACAGGACATTCTGACACC**CCAGGAGCAAACCTCCCTCCATCC**CACAAATCCGTCCTTAGATGTG Wild-type x41  
TCAGACAGGACATT-----CAAACCTCCCTCCATCCACAAATCCGTCCTTAGATGTG Δ15  
TCAGACAGGACATTCT-----GAGCAAACCTCCCTCCATCCACAAATCCGTCCTTAGATGTG Δ10  
TCAGACAGGACATTCTGAC-----GCAAACCTCCCTCCATCCACAAATCCGTCCTTAGATGTG Δ9  
TCAGACAGGACATCCTGACAC-----GCAAACCTCCCTCCATCCACAAATCCGTCCTTAGATGTG Δ7  
TCAGACAGGACATTCTGACACCCAG-----GCAAACCTCCCTCCATCCACAAATCCGTCCTTAGATGTG Δ2 x6

TCAGACAGGACATTCTGACACCCAGGAT**CT**CTCTCTCCCTCCATCCACAAATCCGTCCTTAGATGTG +2

TCAGNCAGGACATTNNGNCACCCAGG**AAACNNGAGTTTTCGNTNCMNNGANNGTCAGACCCAGN**AGCAAACCTCCCTCCATCCACAAATC  
CGTCTTAGATGTG +38

TCAGACAGGACATTNTGACACCCAGG**GTNTGCACNTCAGTTTCTTTANTATGTNGNNNNGGGGCANGNACAAANNTTTN**GCAAACCTCC  
CTCCATCCACAAATCCGTCCTTAGATGTG +54

TCAGACAGGACATTCTGACACCCAGGAT**GT**TTTGTGTTGAGTCAGAGTCTCTCTTTTGT**CACCCAGGCTGGAGTGCAGTGGAAACCTGTGCC**  
**TTTTGTATATCTCTTTGAAGGTTAAAGAGTCATCATGGATCANCNNCATAA**AGCAAACCTCCNTCCATCC +116

TCAGACAGGACATTCTGACACCCAGG**ATAAGCGGCAGGGTCGGAACAGGAGAGCGCACGAGGGAGCTTCCAGGGGAAACGCCTGGTATC**  
**TTTATAGTCTGTGGGTTTCGCACCTCTAGGGAGTCTGAGCTCTGACGCCGGGCGTGTAGGAGATAGCAGGCCGTTAATGACCATC**  
**CCAGCCGAATTCCTCACTGTGCAGATGAGGAAGTGTGAGCTCAGGGAGGCTGAGTGTCCAGGCCCTGTTGCCAGATGAGGCCACGCTGAGACT**  
**CT**GCAAACCTCCCTCCATCCACAAATCCGTCCTTAGATGTG +247

**OT1-6**

TGGAGAGAGGCTCCCATCA**CGGGGGAGGGAGTTTGCTCCTGG**GGAACCTGTGATCCCCACAGGGAAC Wild-type x88  
TGGAGAGAGGCTCCCATCACGGGGAGGGAGTTG-----CCTGTGATCCCCACAGGGAAC Δ11  
TGGAGAGAGGCTCCCATCACGGGGAGGGAGTTT-----GGAACCTGTGATCCCCACAGGGAAC Δ7

**OT1-11**

AGCATCGCTGGACTCTACCCACTGAATG**CCAGGAGCAAACCTCCCTCCCC**GAGTTGTGACAGCAAA Wild-type x84  
AGCATCGCTGGACTCTACCCACTGAATGCCAGGA-----CCCGAGTTGTGACAGCAAA Δ14  
AGCATCGCTGGACTCTACCCACTGA-----GCAAACCTCCCTCCCGAGTTGTGACAGCAAA Δ9  
AGCATCGCTGGACTCTACCCACTGAATGCCAG-----GCAAACCTCCCTCCCGAGTTGTGACAGCAAA Δ2

**AGCATCGCTGGACTCTACCCACTGAATGCCAGGAGTTTCAGACGATTGAATGTATCAACTTGGCACATTGCCTATCAACTGGTGTGCTCA**  
**AAAAATATCCATTGCTGTGATCAGTAATGCCACAGGGTGACCATTTAAGGACAGAGTCCATGTTTTATCCATCCTTAGCAAACCTCCCTCC**  
**CCGAGTTGTGACAGCAAA** +133

AGCATCGCTGGACTCTACCCACTGAATGCCAG**AGCCCTTCTTCTCCCTCTTCTTCTCCAGAGGTCCTGCCGAGATCAGGTTGGAGGTCCT**  
**CTTTGTTCTTATGCCATTCCTCCCCAGGCACCTGGAGGAGGCACTGTTTTGAGTGTGCAAGTCTTCTCTGTTACTGTT**GGGCAAC  
TTCCCTCCCGAGTTGTGACAGCAAA +142

AGCATCGCTGGACTCTACCCACTGAATGCCAGGAT**GT**TTTTGTTT**GCGACGGANTCTCACTCTGT**CGNCCGGGCTGGAGTGCANNGGCACAN  
TTCCCTC**ANCTGACTGCNATGTCCGCCTCCCGATTCAAGTGATTCTCTGCCAGCCTCCCGAGTAGCTGGGATTATAGGTGCCTGCCAC**  
**CATGCCTGGCTAATTTTTTTTTTTTTTTTAAATGGAGTCTCACTCTGTTG**CCCCGAGTTGTGACAGCAAA +186

**Target 2 (VEGFA Site 2):**

**OT2-2**

CACCTCCCTATCCTCAAAACTTGG**CCAGAGGCGGGGTGGAGGGGCC**CTAGGAGCGCCTTGGTGGA  
CACCTCCCTATCCTCAAAACTTGGCCAGAGGCGGGGT-----GGAGCGCCTTGGTGGA Δ13  
CACCTCCCTATCCTCAAAACTT-----GGCGGGGTGGAGGGGCCCTTAGGAGCGCCTTGGTGGA Δ7  
CACCTCCCTATCCTCAAAACTTGG-----GACGGGGTGGAGGGGCCCTTAGGAGCGCCTTGGTGGA Δ6  
CACCTCCCTATCCTCAAAACTTGGCC-----AGGCGGGGTGGAGGGGCCCTTAGGAGCGCCTTGGTGGA Δ2

CACCTCCCTATCCTCAAAACTTGGCCAG**GACTTANACCTAANACCTCAAACTATGAGACTGCTACNAGAGAACATCANAAAACTTTCCA**  
**GGACATTCCTCT**GGNNGGGTGGAGGGGCCCTTANGAGCGCCTTGNNGGA +74

CACCTCCCTATCCTCAAAACTTGGCCAG**GTCTACAGATTTATAAAATATTACCAGTTAATCATGACACATATTGTTTATTTCAAATATT**  
**TTTTCTAGTTAAACCCACCATTTATATAACCAATTATATTTGATATTATTTAAAATTTTTGTATTAACACCCACCAAATCATTTTACAGC**

GGGGTGGAGGGGCCCCCTAGGAGCGCCTTGGTGGGA +150

**OT2-15**

GTCGGTGCCCCACATGTGGCAGATGC **CCAGAGGCGGGGTGTGGGGGGTA**CTTTGTGGGCGTTTGGG Wild-type x79  
GTCGGTGCCCCAC-----GCGGGGTGTGGGGGGTACTTTGTGGGCGTTTGGG Δ19  
GTCGGTGCCCCACATGTGGC-----GCGGGGTGTGGGGGGTACTTTGTGGGCGTTTGGG Δ12  
GTCGGTGCCCCACATGTGGCAGATGCCAGA-----GGTGTGGGGGTACTTTGTGGGCGTTTGGG Δ5  
GTCGGTGCCCCACATGTGGCAGATGCCCA-----GGGGTGTGGGGGGTACTTTGTGGGCGTTTGGG Δ5  
GTCGGTGCCCCACATGTGGCAGATGCCAGA-----GGGTGTGGGGGGTACTTTGTGGGCGTTTGGG Δ4  
GTCGGTGCCCCACATGTGGCAGATGCC-----GCGGGGTGTGGGGGGTACTTTGTGGGCGTTTGGG Δ4  
GTCGGTGCCCCACATGTGGCAGATGCC-----AGGCGGGGTGTGGGGGGTACTTTGTGGGCGTTTGGG Δ2 x2

**OT2-24**

GTCCTCTGGGCCCCATCCTCCC **CTCCCCACCACCCCCCCTCAGG**CTTGAAGAGGAAAGAAGAGCA  
GTCCTCTGGGCCCC-----ANAGNANNANNANNNN Δ36  
GTCCTCTGGGCCCCATCCTCCCCTCCC-----TGAAGAGGAAAGAAGAGCG Δ19  
GTCCTCTNNNNNT-----CCNCNCTCAGGCTTGAAGAGGAAAGAAGAGCG Δ17  
GTCCTCTGGGCCCCATCCTCCCCTC-----CCTCAGGCTTGAAGAGGAAAGAAGAGCG Δ13  
GTCCTCTGGGCCCCATCCTCCCCTCCCCA-----CTCAGGCTTGAAGAGGAAAGAAGAGCG Δ10  
GTCCTCNNNNNNNTCCTCCC-----NNCCNCNCTCAGGCTTGAAGAGGAAAGAAGAGCG Δ8  
GTCCTCTGGGCCCCATCCTCCCCTCCCCACCA-----CTCAGGCTTGAAGAGGAAAGAAGAGCG Δ6  
GTCCTCTGGGCCCCATCCTCCCCTCCCCACCA-----CCTCAGGCTTGAAGAGGAAAGAAGAGCG Δ5

GTCCTCTGGGCCCCATCCTCCCCTCCCACCACCCCG **CATCGTACGTGTCCTTACTAAGCTGCAATTTGGCATCTTCAGCTAAGTCGAA**  
**GTTTCGACCTCAGGCTTGAAGAGGAAAGAAGAGCG** +58

**Target 3 (VEGFA Site 3):**

**OT3-2\***

GAGAGCGAGTGAGTG **AGTGAGTGAGTGTGTGTGGG**GGGACTCGGCTTGTGTTGTTCGGTGACTT Wild-type x26

GAGAGCGAGTGAGTGAGTGAGTGAGTGTGNGTNTNNNNA **TTTACACAACATACGAGCCGGAAGCATAAAGTGTAAAGCCTAGGGTGCCTA**  
**ATGAGTGAGCTAACTCACATTAATTGCGTTGCGCTCACTGCCCCGTTTCCAGTCGGGAAACCTGTCTGTGCCAGCTGCATTAATGAATCGGC**  
**CAANNNNNNGNAGAGGCGGTTTGCATATGGGCGCTCTCCGCTTCTCGCTCACTGACTCGCTGCGCTCGGTCGTTCCGCTGCGGGCAG**  
**CGGTATCAGCTCACTCAAAGCGGTAATACGGTTATCCACANAAN**GGGACTCGGCTTGTGTTGTTCGGTGACTT +280

**OT3-9**

TGGAGGTGTTGGGATGCGGGAGTG **GGTGAGTGAGTGCGTGCGGGTGG**CGATGCAAGCGTGTGCGAAT Wild-type x101  
TGGAGGTGTTGGGATGCGGGAGTGG-----GTGCGTGCGGGTGGCGATGCAAGCGTGTGCGAAT Δ8  
TGGAGGTGTTGGGATGCGGGAGTGGGTGA-----GTGCGGGTGGCGATGCAAGCGTGTGCGAAT Δ8

**OT3-18**

CAAAGACAGTAGATCTTAAATGT **CCTCACGCACACTCACCCACA**CATAAAAAGGTGGTAACTGTGT Wild-type x64  
CAAAGACAGTAGATCTTAA-----GCACACTCACCCACACATAAAAAGGTGGTAACTGTGT Δ10  
CAAAGACAGTAGATCTTAAATGTCTCAG-----TCACCACACATAAAAAGGTGGTAACTGTGT Δ7  
CAAAGACAGTAGATCTTAAATGTC-----GCACACTCACCCACACATAAAAAGGTGGTAACTGTGT Δ5

CAAAGACAGTAGATCTTAAATGTCTCAG **GCCGACNATTCATGAAGAATCTGCTTAGGGTTAGGCGTTTGCCTGCTTCGCGATGTACG**  
**GGCCAGATA**GCACACTCACCCACACATAAAAAGGTGGTAACTGTGT +71

CAAAGACAGTAGATCTTAAATGTCTCAG **GCAAATTTATTTGGTTCATGATATGGCTTGGCGTGTATGCTTTTCATTTGTAAAATGCT**  
**GTTCTTTTGACAATTTAAGTACTGTTTCATTTACTACAAGTTTGAAAATAAAAATAATTAAAGAAAAAATCCAATGACTGTGCTGTGG**  
**TTGG**GCACACTCACCCACACATAAAAAGGTGGTAACTGTGT +157

CAAAGACAGTAGATCTTAAATGTCTCAG **GTGAAACATAGTAGATGAGGTGGCATATCATGAAAAGTACCAACGATTTATCACCTCANA**  
**AAAAAGCTAGTTGACTCAACTGATAAAGCGGACCTGAGGTTAATCTACTTGCTCTTGCCCATATGATAAAGTTCCGTGGGCACTTTCTCA**  
**TTGAGGGTGATCTAAATCCGGACAACCTCGGATGTCGAGCACACTCACCCACACATAAAAAGGTGGTAACTGTGT** +190

CAAAGACAGTAGATCTTAAATGTCTCAG-----  
**TTATTTAGAGACAGAGTCTCACTCTGTTGCCAGGCTGGGGTGCAGTGGTACGAACCTCGGCTCACTGCAACCTCCGTCTCCTGGGCTCAAG**  
**TGATTATCCTGCCTCAGCCTCCGAGTAGCTGGGATTACAGGTGCCACCACCACCCCGCTAATTTTGTATTTTCAGTAGAGCTGGG**  
**TTTCAACATGTTGGCCAGCCTGTTCTCGGCACACTCACCCACA**CATAAAAAGGTGGTAACTGTGT +211 (Δ16 +227)

**Target 4 (EMX1):**

**OT4-1**

GATTGCCTTTACTCCATG**CCTTTCTTCTTCTGCTCTAACTC**TGACAATCTGTCTTGCCATGCCATAA Wild-type x74  
GATTGCCTTTACTC-----CTTCTTCTGCTCTAACTCTGACAATCTGTCTTGCCATGCCATAA Δ9  
GATTGCCTTTACTCCATGCCT-----TTCTGCTCTAACTCTGACAATCTGTCTTGCCATGCCATAA Δ6 x2  
GATTGCCTTTACTCCATGC-----TCTTCTGCTCTAACTCTGACAATCTGTCTTGCCATGCCATAA Δ6  
GATTGCCTTTACTCCATGCCT---TTCTTCTGCTCTAACTCTGACAATCTGTCTTGCCATGCCATAA Δ3 x3

**Supplementary Fig. 4 Sequences of off-target indel mutations induced by RGENs in human HEK293**

**cells**

Wild-type genomic off-target sites recognized by RGENs (including the PAM sequence) are highlighted in yellow and numbered as in **Table 1** and **Supplementary Table 2**. Note that the complementary strand is shown for some sites. Deleted bases are shown as red dashes on a grey background. Inserted bases are italicized and highlighted in blue. \*Yielded a large number of single bp indels

**Supplementary Table 1 Sequences of oligonucleotides used to generate expression plasmids encoding sgRNAs/variant sgRNAs targeted to sites in the *EGFP* reporter gene and sgRNAs targeted to six endogenous human gene targets**

***See accompanying file***

**Supplementary Table 2 Sequences and characteristics of genomic on- and off-target sites for six RGENs targeted to endogenous human genes and primers and PCR conditions used to amplify these sites**

*See accompanying file*

**Supplementary Table 3 Numbers of off-target sites in the human genome for six RGENs targeted to endogenous human genes and three RGENs targeted to the *EGFP* reporter gene**

| Target Site                     | Number of mismatches to on-target site |   |    |     |      |       |       |
|---------------------------------|----------------------------------------|---|----|-----|------|-------|-------|
|                                 | 0                                      | 1 | 2  | 3   | 4    | 5     | 6     |
| Target 1 ( <i>VEGFA</i> Site 1) | 1                                      | 1 | 4  | 32  | 280  | 2175  | 13873 |
| Target 2 ( <i>VEGFA</i> Site 2) | 1                                      | 0 | 2  | 35  | 443  | 3889  | 17398 |
| Target 3 ( <i>VEGFA</i> Site 3) | 1                                      | 1 | 17 | 377 | 6028 | 13398 | 35517 |
| Target 4 ( <i>EMX</i> )         | 1                                      | 0 | 1  | 18  | 276  | 2309  | 15731 |
| Target 5 ( <i>RNF2</i> )        | 1                                      | 0 | 0  | 6   | 116  | 976   | 7443  |
| Target 6 ( <i>FANCF</i> )       | 1                                      | 0 | 1  | 18  | 271  | 1467  | 9551  |
| EGFP Target Site #1             | 0                                      | 0 | 3  | 10  | 156  | 1365  | 9755  |
| EGFP Target Site #2             | 0                                      | 0 | 0  | 11  | 96   | 974   | 7353  |
| EGFP Target Site #3             | 0                                      | 0 | 1  | 14  | 165  | 1439  | 10361 |

Off-target sites for each of the six RGENs targeted to the *VEGFA*, *RNF2*, *FANCF*, and *EMX1* genes and the three RGENs targeted to EGFP Target Sites #1, #2 and #3 were identified in human genome sequence build GRCh37. Mismatches were only allowed for the 20 nt region to which the sgRNA anneals and not to the PAM sequence.

**Supplementary Table 4 Indel mutation frequencies at on- and off-target genomic sites induced by different amounts of Cas9- and sgRNA-expressing plasmids for the RGEN targeted to VEGFA Target**

**Site 3**

| Site           | Sequence                                                   | 250ng sgRNA/750 ng Cas9<br>Mean indel frequency (%) $\pm$ SEM | 12.5ng sgRNA/250 ng Cas9<br>Mean indel frequency (%) $\pm$ SEM |
|----------------|------------------------------------------------------------|---------------------------------------------------------------|----------------------------------------------------------------|
| T3 (On-target) | GGTGAGTGAGTGTGTGCGTGTGG                                    | 49.4 $\pm$ 3.8                                                | 33.0 $\pm$ 3.7                                                 |
| OT3-1          | GGTGAGTGAGTGTGTG <b>T</b> TGTGAGG                          | 7.4 $\pm$ 3.4                                                 | <i>N.D.</i>                                                    |
| OT3-2          | <b>A</b> GTGAGTGAGTGTGTG <b>T</b> TGTGGGG                  | 24.3 $\pm$ 9.2                                                | 9.8 $\pm$ 4.2                                                  |
| OT3-4          | G <b>C</b> TGAGTGAGTGT <b>A</b> TGCGTGTGG                  | 20.9 $\pm$ 11.8                                               | 4.2 $\pm$ 1.2                                                  |
| OT3-9          | GGTGAGTGAGTG <b>C</b> GTGCG <b>G</b> GTGG                  | 3.2 $\pm$ 0.3                                                 | <i>N.D.</i>                                                    |
| OT3-17         | G <b>T</b> TGAGTGA <b>A</b> TGTGTGCGTGAGG                  | 2.9 $\pm$ 0.2                                                 | <i>N.D.</i>                                                    |
| OT3-18         | <b>T</b> GT <b>G</b> G <b>T</b> GTGAGTGTGTGCGTGAGG         | 13.4 $\pm$ 4.2                                                | 4.9 $\pm$ 0.0                                                  |
| OT3-20         | <b>A</b> G <b>A</b> GAGTGAGTGTGTG <b>C</b> A <b>T</b> GAGG | 16.7 $\pm$ 3.5                                                | 7.9 $\pm$ 2.4                                                  |

Amounts of sgRNA- and Cas9-expressing plasmids transfected into U2OS.EGFP cells for these assays are shown at the top of each column. (Note that data for 250 ng sgRNA/750 ng Cas9 are the same as those presented in **Table 1**.) Mean indel frequencies were determined using the T7EI assay from replicate samples as described in Methods. OT = Off-target sites, numbered as in **Table 1** and **Supplementary Table 2**. *N.D.* = none detected

**Supplementary References:**

1. Maeder, M.L. et al. Rapid "open-source" engineering of customized zinc-finger nucleases for highly efficient gene modification. *Mol Cell* **31**, 294-301 (2008).
2. Reyon, D. et al. FLASH assembly of TALENs for high-throughput genome editing. *Nat Biotech* **30**, 460-465 (2012).
