# Supplementary material
Source: PubMed Central journal article supplement (PMC3773023)
Supplement: NIHMS488397-supplement-table_1.pdf [file NIHMS488397-supplement-table_1.pdf]

| gRNA Target Sequence Position |    |    |    |    |    |    |    |    |    |    |   |   |   |   |   |   |   | Oligos for generating gRNA expression plasmid |                              |                            |                             |
|-------------------------------|----|----|----|----|----|----|----|----|----|----|---|---|---|---|---|---|---|-----------------------------------------------|------------------------------|----------------------------|-----------------------------|
| EGFP Target Site 1            |    |    |    |    |    |    |    |    |    |    |   |   |   |   |   |   |   | oligonucleotide 1 (5' to 3')                  | oligonucleotide 2 (5' to 3') |                            |                             |
| 20                            | 19 | 18 | 17 | 16 | 15 | 14 | 13 | 12 | 11 | 10 | 9 | 8 | 7 | 6 | 5 | 4 | 3 | 2                                             | 1                            |                            |                             |
| G                             | G  | G  | C  | A  | C  | G  | G  | G  | C  | A  | G | C | T | T | G | C | C | G                                             | G                            | ACACCGGGCACGGGCAGCTTGCCGGG | AAAACCCGGCAAGCTGCCCGTGCCCG  |
| G                             | G  | G  | C  | A  | C  | G  | G  | G  | C  | A  | G | C | T | T | G | C | C | G                                             | c                            | ACACCGGGCACGGGCAGCTTGCCGGG | AAAACCGGGCAAGCTGCCCGTGCCCG  |
| G                             | G  | G  | C  | A  | C  | G  | G  | G  | C  | A  | G | C | T | T | G | C | C | c                                             | G                            | ACACCGGGCACGGGCAGCTTGCCCGG | AAAACCCGGCAAGCTGCCCGTGCCCG  |
| G                             | G  | G  | C  | A  | C  | G  | G  | G  | C  | A  | G | C | T | T | G | C | g | G                                             | G                            | ACACCGGGCACGGGCAGCTTGCCGGG | AAAACCCCGCAAGCTGCCCGTGCCCG  |
| G                             | G  | G  | C  | A  | C  | G  | G  | G  | C  | A  | G | C | T | T | G | g | C | G                                             | G                            | ACACCGGGCACGGGCAGCTTGCCGGG | AAAACCCGCCAAGCTGCCCGTGCCCG  |
| G                             | G  | G  | C  | A  | C  | G  | G  | G  | C  | A  | G | C | T | T | c | C | C | G                                             | G                            | ACACCGGGCACGGGCAGCTTCCCGGG | AAAACCCGGGAAGCTGCCCGTGCCCG  |
| G                             | G  | G  | C  | A  | C  | G  | G  | G  | C  | A  | G | C | T | a | G | C | C | G                                             | G                            | ACACCGGGCACGGGCAGCTAGCCGGG | AAAACCCGGCTAGCTGCCCGTGCCCG  |
| G                             | G  | G  | C  | A  | C  | G  | G  | G  | C  | A  | G | C | a | T | G | C | C | G                                             | G                            | ACACCGGGCACGGGCAGCATGCCGGG | AAAACCCGGCATGCTGCCCGTGCCCG  |
| G                             | G  | G  | C  | A  | C  | G  | G  | G  | C  | A  | G | g | T | T | G | C | C | G                                             | G                            | ACACCGGGCACGGGCAGGTTGCCGGG | AAAACCCGGCAACCTGCCCGTGCCCG  |
| G                             | G  | G  | C  | A  | C  | G  | G  | G  | C  | A  | c | C | T | T | G | C | C | G                                             | G                            | ACACCGGGCACGGGCACCTTGCCGGG | AAAACCCGGCAAGGTGCCCGTGCCCG  |
| G                             | G  | G  | C  | A  | C  | G  | G  | G  | C  | t  | G | C | T | T | G | C | C | G                                             | G                            | ACACCGGGCACGGGCTGCTTGCCGGG | AAAACCCGGCAAGCAGCCCGTGCCCG  |
| G                             | G  | G  | C  | A  | C  | G  | G  | G  | g  | A  | G | C | T | T | G | C | C | G                                             | G                            | ACACCGGGCACGGGGAGCTTGCCGGG | AAAACCCGGCAAGCTCCCCGTGCCCG  |
| G                             | G  | G  | C  | A  | C  | G  | G  | c  | C  | A  | G | C | T | T | G | C | C | G                                             | G                            | ACACCGGGCACGGCCAGCTTGCCGGG | AAAACCCGGCAAGCTGGCCGTGCCCG  |
| G                             | G  | G  | C  | A  | C  | G  | c  | G  | C  | A  | G | C | T | T | G | C | C | G                                             | G                            | ACACCGGGCACGCGCAGCTTGCCGGG | AAAACCCGGCAAGCTGCGCGTGCCCG  |
| G                             | G  | G  | C  | A  | C  | c  | G  | G  | C  | A  | G | C | T | T | G | C | C | G                                             | G                            | ACACCGGGCACCGGCAGCTTGCCGGG | AAAACCCGGCAAGCTGCCGGTGCCCG  |
| G                             | G  | G  | C  | A  | g  | G  | G  | G  | C  | A  | G | C | T | T | G | C | C | G                                             | G                            | ACACCGGGCAGGGCAGCTTGCCGGG  | AAAACCCGGCAAGCTGCCCCGTGCCCG |
| G                             | G  | G  | C  | t  | C  | G  | G  | G  | C  | A  | G | C | T | T | G | C | C | G                                             | G                            | ACACCGGGCTCGGGCAGCTTGCCGGG | AAAACCCGGCAAGCTGCCCGAGCCCG  |
| G                             | G  | G  | g  | A  | C  | G  | G  | G  | C  | A  | G | C | T | T | G | C | C | G                                             | G                            | ACACCGGGGACGGGCAGCTTGCCGGG | AAAACCCGGCAAGCTGCCCGTCCCCG  |
| G                             | G  | c  | C  | A  | C  | G  | G  | G  | C  | A  | G | C | T | T | G | C | C | G                                             | G                            | ACACCGGCCACGGGCAGCTTGCCGGG | AAAACCCGGCAAGCTGCCCGTGGCCG  |
| G                             | c  | G  | C  | A  | C  | G  | G  | G  | C  | A  | G | C | T | T | G | C | C | G                                             | G                            | ACACCGCGCACGGGCAGCTTGCCGGG | AAAACCCGGCAAGCTGCCCGTGCGCG  |
| G                             | G  | G  | C  | A  | C  | G  | G  | G  | C  | A  | G | C | T | T | G | C | C | c                                             | c                            | ACACCGGGCACGGGCAGCTTGCCCCG | AAAACGGGGCAAGCTGCCCGTGCCCG  |
| G                             | G  | G  | C  | A  | C  | G  | G  | G  | C  | A  | G | C | T | T | G | g | g | G                                             | G                            | ACACCGGGCACGGGCAGCTTGGGGGG | AAAACCCCCCAAGCTGCCCGTGCCCG  |
| G                             | G  | G  | C  | A  | C  | G  | G  | G  | C  | A  | G | C | T | a | c | C | C | G                                             | G                            | ACACCGGGCACGGGCAGCTACCCGGG | AAAACCCGGGTAGCTGCCCGTGCCCG  |
| G                             | G  | G  | C  | A  | C  | G  | G  | G  | C  | A  | G | g | a | T | G | C | C | G                                             | G                            | ACACCGGGCACGGGCAGGATGCCGGG | AAAACCCGGCATCCTGCCCGTGCCCG  |
| G                             | G  | G  | C  | A  | C  | G  | G  | G  | C  | t  | c | C | T | T | G | C | C | G                                             | G                            | ACACCGGGCACGGGCTCCTTGCCGGG | AAAACCCGGCAAGGAGCCCGTGCCCG  |
| G                             | G  | G  | C  | A  | C  | G  | G  | c  | g  | A  | G | C | T | T | G | C | C | G                                             | G                            | ACACCGGGCACGGCGAGCTTGCCGGG | AAAACCCGGCAAGCTCGCCGTGCCCG  |
| G                             | G  | G  | C  | A  | C  | c  | c  | G  | C  | A  | G | C | T | T | G | C | C | G                                             | G                            | ACACCGGGCACCCGCAGCTTGCCGGG | AAAACCCGGCAAGCTGCGGGTGCCCG  |
| G                             | G  | c  | g  | A  | C  | G  | G  | G  | C  | A  | G | C | T | T | G | C | C | G                                             | G                            | ACACCGGGCTGGGGCAGCTTGCCGGG | AAAACCCGGCAAGCTGCCCCAGCCCG  |
| G                             | c  | c  | C  | A  | C  | G  | G  | G  | C  | A  | G | C | T | T | G | C | C | G                                             | G                            | ACACCGGCGACGGGCAGCTTGCCGGG | AAAACCCGGCAAGCTGCCCGTCGCCG  |
| G                             | c  | C  | g  | A  | C  | G  | G  | G  | C  | A  | G | C | T | T | G | C | C | G                                             | G                            | ACACCGCCACGGGCAGCTTGCCGGG  | AAAACCCGGCAAGCTGCCCGTGCCCG  |
| G                             | c  | c  | g  | t  | C  | G  | G  | G  | C  | A  | G | C | T | T | G | C | C | G                                             | G                            | ACACCGCCGTGGGCAGCTTGCCGGG  | AAAACCCGGCAAGCTGCCCGTGCCCG  |
| G                             | c  | c  | g  | t  | g  | G  | G  | G  | C  | A  | G | C | T | T | G | C | C | G                                             | G                            | ACACCGCCGTGGGGCAGCTTGCCGGG | AAAACCCGGCAAGCTGCCCGTGCCCG  |
| G                             | c  | c  | g  | t  | g  | c  | G  | G  | C  | A  | G | C | T | T | G | C | C | G                                             | G                            | ACACCGCCGTGCGGCAGCTTGCCGGG | AAAACCCGGCAAGCTGCCCGTGCCCG  |
| G                             | c  | c  | g  | t  | g  | c  | c  | G  | C  | A  | G | C | T | T | G | C | C | G                                             | G                            | ACACCGCCGTGCCGCAGCTTGCCGGG | AAAACCCGGCAAGCTGCCCGTGCCCG  |
| G                             | c  | c  | g  | t  | g  | c  | c  | c  | C  | A  | G | C | T | T | G | C | C | G                                             | G                            | ACACCGCCGTGCCCCAGCTTGCCGGG | AAAACCCGGCAAGCTGCCCGTGCCCG  |
| G                             | c  | c  | g  | t  | g  | c  | c  | c  | g  | A  | G | C | T | T | G | C | C | G                                             | G                            | ACACCGCCGTGCCCGAGCTTGCCGGG | AAAACCCGGCAAGCTGCCCGTGCCCG  |
| G                             | G  | G  | C  | A  | C  | G  | G  | G  | C  | A  | G | C | T | T | G | C | g | G                                             | c                            | ACACCGGGCACGGGCAGCTTGCCGGG | AAAACGCCGCAAGCTGCCCGTGCCCG  |
| G                             | G  | G  | C  | A  | C  | G  | G  | G  | C  | A  | G | C | T | T | c | C | g | G                                             | G                            | ACACCGGGCACGGGCAGCTTCCGGGG | AAAACCCCGGAAGCTGCCCGTGCCCG  |
| G                             | G  | G  | C  | A  | C  | G  | G  | G  | C  | A  | G | C | a | T | G | C | g | G                                             | G                            | ACACCGGGCACGGGCAGCATGCCGGG | AAAACCCCGCATGCTGCCCGTGCCCG  |

|   |   |   |   |   |   |   |   |   |   |   |   |   |   |   |   |   |   |   |   |                            |                            |
|---|---|---|---|---|---|---|---|---|---|---|---|---|---|---|---|---|---|---|---|----------------------------|----------------------------|
| G | G | G | C | A | C | G | G | G | C | A | c | C | T | T | G | C | g | G | G | ACACCGGGCACGGGCACCTTGCGGGG | AAAACCCCGCAAGGTGCCCGTGCCCG |
| G | G | G | C | A | C | G | G | G | g | A | G | C | T | T | G | C | g | G | G | ACACCGGGCACGGGGAGCTTGCGGGG | AAAACCCCGCAAGCTCCCCGTGCCCG |
| G | G | G | C | A | C | G | c | G | C | A | G | C | T | T | G | C | g | G | G | ACACCGGGCACGCGCAGCTTGCGGGG | AAAACCCCGCAAGCTGCGCGTGCCCG |
| G | G | G | C | A | g | G | G | G | C | A | G | C | T | T | G | C | g | G | G | ACACCGGGCAGGGGCAGCTTGCGGGG | AAAACCCCGCAAGCTGCCCTGCCCG  |
| G | G | G | g | A | C | G | G | G | C | A | G | C | T | T | G | C | g | G | G | ACACCGGGGACGGGCAGCTTGCGGGG | AAAACCCCGCAAGCTGCCCGTGCCCG |
| G | c | G | C | A | C | G | G | G | C | A | G | C | T | T | G | C | g | G | G | ACACCGCGCACGGGCAGCTTGCGGGG | AAAACCCCGCAAGCTGCCCGTGCGCG |
| G | G | G | C | A | C | G | G | G | g | A | G | C | T | T | G | C | C | G | c | ACACCGGGCACGGGGAGCTTGCCGCG | AAAACGCGGCAAGCTCCCCGTGCCCG |
| G | G | G | C | A | C | G | G | G | g | A | G | C | T | T | c | C | C | G | G | ACACCGGGCACGGGGAGCTTCCCGGG | AAAACCCGGGAAGCTCCCCGTGCCCG |
| G | G | G | C | A | C | G | G | G | g | A | G | C | a | T | G | C | C | G | G | ACACCGGGCACGGGGAGCATGCCGGG | AAAACCCGGCATGCTCCCCGTGCCCG |
| G | G | G | C | A | C | G | G | G | g | A | c | C | T | T | G | C | C | G | G | ACACCGGGCACGGGGACCTTGCCGGG | AAAACCCGGCAAGGTCCCCGTGCCCG |
| G | G | G | C | A | C | G | c | G | g | A | G | C | T | T | G | C | C | G | G | ACACCGGGCACGCGGAGCTTGCCGGG | AAAACCCGGCAAGCTCCGCGTGCCCG |
| G | G | G | C | A | g | G | G | G | g | A | G | C | T | T | G | C | C | G | G | ACACCGGGCAGGGGGAGCTTGCCGGG | AAAACCCGGCAAGCTCCCCGTGCCCG |
| G | G | G | g | A | C | G | G | G | g | A | G | C | T | T | G | C | C | G | G | ACACCGGGGACGGGGAGCTTGCCGGG | AAAACCCGGCAAGCTCCCCGTGCCCG |
| G | c | G | C | A | C | G | G | G | g | A | G | C | T | T | G | C | C | G | G | ACACCGCGCACGGGGAGCTTGCCGGG | AAAACCCGGCAAGCTCCCCGTGCGCG |
| G | c | G | C | A | C | G | G | G | C | A | G | C | T | T | G | C | C | G | c | ACACCGCGCACGGGCAGCTTGCCGCG | AAAACCCGGGAAGCTGCCCGTGCGCG |
| G | c | G | C | A | C | G | G | G | C | A | G | C | T | T | c | C | C | G | G | ACACCGCGCACGGGCAGCTTCCCGGG | AAAACCCGGGAAGCTGCCCGTGCGCG |
| G | c | G | C | A | C | G | G | G | C | A | G | C | a | T | G | C | C | G | G | ACACCGCGCACGGGCAGCATGCCGGG | AAAACCCGGCATGCTGCCCGTGCGCG |
| G | c | G | C | A | C | G | G | G | C | A | c | C | T | T | G | C | C | G | G | ACACCGCGCACGGGCACCTTGCCGGG | AAAACCCGGCAAGGTGCCCGTGCGCG |
| G | c | G | C | A | C | G | c | G | C | A | G | C | T | T | G | C | C | G | G | ACACCGCGCACGCGCAGCTTGCCGGG | AAAACCCGGCAAGCTGCGCGTGCGCG |
| G | c | G | C | A | g | G | G | G | C | A | G | C | T | T | G | C | C | G | G | ACACCGCGCAGGGGCAGCTTGCCGGG | AAAACCCGGCAAGCTGCCCTGCCCG  |
| G | c | G | g | A | C | G | G | G | C | A | G | C | T | T | G | C | C | G | G | ACACCGCGGACGGGCAGCTTGCCGGG | AAAACCCGGCAAGCTGCCCGTCCGCG |

**EGFP Target Site 2**

| 20 | 19 | 18 | 17 | 16 | 15 | 14 | 13 | 12 | 11 | 10 | 9 | 8 | 7 | 6 | 5 | 4 | 3 | 2 | 1 | oligonucleotide 1 (5' to 3') | oligonucleotide 2 (5' to 3') |
|----|----|----|----|----|----|----|----|----|----|----|---|---|---|---|---|---|---|---|---|------------------------------|------------------------------|
| G  | A  | T  | G  | C  | C  | G  | T  | T  | C  | T  | T | C | T | G | C | T | T | G | T | ACACCGATGCCGTTCTTCTGCTTGTG   | AAAACACAAGCAGAAGAACGGCATCG   |
| G  | A  | T  | G  | C  | C  | G  | T  | T  | C  | T  | T | C | T | G | C | T | T | G | a | ACACCGATGCCGTTCTTCTGCTTGTG   | AAAACACAAGCAGAAGAACGGCATCG   |
| G  | A  | T  | G  | C  | C  | G  | T  | T  | C  | T  | T | C | T | G | C | T | T | c | T | ACACCGATGCCGTTCTTCTGCTTCTG   | AAAACACAAGCAGAAGAACGGCATCG   |
| G  | A  | T  | G  | C  | C  | G  | T  | T  | C  | T  | T | C | T | G | C | a | T | G | T | ACACCGATGCCGTTCTTCTGCATGTG   | AAAACACAAGCAGAAGAACGGCATCG   |
| G  | A  | T  | G  | C  | C  | G  | T  | T  | C  | T  | T | C | T | G | g | T | T | G | T | ACACCGATGCCGTTCTTCTGTTTGTG   | AAAACACAAGCAGAAGAACGGCATCG   |
| G  | A  | T  | G  | C  | C  | G  | T  | T  | C  | T  | T | C | T | c | C | T | T | G | T | ACACCGATGCCGTTCTTCTCCTTGTG   | AAAACACAAGCAGAAGAACGGCATCG   |
| G  | A  | T  | G  | C  | C  | G  | T  | T  | C  | T  | T | C | a | G | C | T | T | G | T | ACACCGATGCCGTTCTTCTCAGCTTGTG | AAAACACAAGCAGAAGAACGGCATCG   |
| G  | A  | T  | G  | C  | C  | G  | T  | T  | C  | T  | T | g | T | G | C | T | T | G | T | ACACCGATGCCGTTCTTGTGCTTGTG   | AAAACACAAGCAGAAGAACGGCATCG   |
| G  | A  | T  | G  | C  | C  | G  | T  | T  | C  | a  | T | C | T | G | C | T | T | G | T | ACACCGATGCCGTTCTACTGCTTGTG   | AAAACACAAGCAGAAGAACGGCATCG   |
| G  | A  | T  | G  | C  | C  | G  | T  | T  | C  | a  | T | C | T | G | C | T | T | G | T | ACACCGATGCCGTTCTACTGCTTGTG   | AAAACACAAGCAGAAGAACGGCATCG   |
| G  | A  | T  | G  | C  | C  | G  | T  | T  | g  | T  | T | C | T | G | C | T | T | G | T | ACACCGATGCCGTTCTTCTGCTTGTG   | AAAACACAAGCAGAAGAACGGCATCG   |
| G  | A  | T  | G  | C  | C  | G  | T  | T  | a  | C  | T | T | C | T | G | C | T | T | G | ACACCGATGCCGTTCTTCTGCTTGTG   | AAAACACAAGCAGAAGAACGGCATCG   |
| G  | A  | T  | G  | C  | C  | G  | a  | T  | C  | T  | T | C | T | G | C | T | T | G | T | ACACCGATGCCGTTCTTCTGCTTGTG   | AAAACACAAGCAGAAGAACGGCATCG   |
| G  | A  | T  | G  | C  | C  | c  | T  | T  | C  | T  | T | C | T | G | C | T | T | G | T | ACACCGATGCCGTTCTTCTGCTTGTG   | AAAACACAAGCAGAAGAACGGCATCG   |
| G  | A  | T  | G  | C  | g  | G  | T  | T  | C  | T  | T | C | T | G | C | T | T | G | T | ACACCGATGCGGTTCTTCTGCTTGTG   | AAAACACAAGCAGAAGAACGGCATCG   |
| G  | A  | T  | G  | g  | C  | G  | T  | T  | C  | T  | T | C | T | G | C | T | T | G | T | ACACCGATGGCGTTCTTCTGCTTGTG   | AAAACACAAGCAGAAGAACGGCATCG   |
| G  | A  | T  | c  | C  | C  | G  | T  | T  | C  | T  | T | C | T | G | C | T | T | G | T | ACACCGATCCCCTTCTTCTGCTTGTG   | AAAACACAAGCAGAAGAACGGCATCG   |
| G  | A  | t  | G  | C  | C  | G  | T  | T  | C  | T  | T | C | T | G | C | T | T | G | T | ACACCGAAGCCGTTCTTCTGCTTGTG   | AAAACACAAGCAGAAGAACGGCATCG   |

G a T G C C G T T C T T C T G C T T G T ACACCGTTGCCGTTCTTCTGCTTGTG  
G A T G C C G T T C T T C T G C T T c a ACACCGATGCCGTTCTTCTGCTTCTAG  
G A T G C C G T T C T T C T G C a a G T ACACCGATGCCGTTCTTCTGCAAGTG  
G A T G C C G T T C T T C T c g T T G T ACACCGATGCCGTTCTTCTCGTTTGTG  
G A T G C C G T T C T T g a G C T T G T ACACCGATGCCGTTCTTCTGAGCTTGTG  
G A T G C C G T T C a a C T G C T T G T ACACCGATGCCGTTCAACTGCTTGTG  
G A T G C C G T a g T T C T G C T T G T ACACCGATGCCGTAGTTCTGCTTGTG  
G A T G C C c a T C T T C T G C T T G T ACACCGATGCCCATCTTCTGCTTGTG  
G A T G g g G T T C T T C T G C T T G T ACACCGATGGGGTTCTTCTGCTTGTG  
G A a c C C G T T C T T C T G C T T G T ACACCGAACCCGTTCTTCTGCTTGTG  
G t a G C C G T T C T T C T G C T T G T ACACCGTAGCCGTTCTTCTGCTTGTG  
G t a c C C G T T C T T C T G C T T G T ACACCGTACCCGTTCTTCTGCTTGTG  
G t a c g C G T T C T T C T G C T T G T ACACCGTACGCGTTCTTCTGCTTGTG  
G t a c g g G T T C T T C T G C T T G T ACACCGTACGGGTTCTTCTGCTTGTG  
G t a c g g c T T C T T C T G C T T G T ACACCGTACGGCTTCTTCTGCTTGTG  
G t a c g g c a T C T T C T G C T T G T ACACCGTACGGCATCTTCTGCTTGTG  
G t a c g g c a a C T T C T G C T T G T ACACCGTACGGCAACTTCTGCTTGTG  
G t a c g g c a a g T T C T G C T T G T ACACCGTACGGCAAGTTCTGCTTGTG  
G A T G C C G T T C T T C T G C T a G a ACACCGATGCCGTTCTTCTGCTAGAG  
G A T G C C G T T C T T C T G g T a G T ACACCGATGCCGTTCTTCTGGTAGTG  
G A T G C C G T T C T T C a G C T a G T ACACCGATGCCGTTCTTCTAGCTAGTG  
G A T G C C G T T C T a C T G C T a G T ACACCGATGCCGTTCTACTGCTAGTG  
G A T G C C G T T g T T C T G C T a G T ACACCGATGCCGTTGTTCTGCTAGTG  
G A T G C C G a T C T T C T G C T a G T ACACCGATGCCGATCTTCTGCTAGTG  
G A T G C g G T T C T T C T G C T a G T ACACCGATGCGGTTCTTCTGCTAGTG  
G A T c C C G T T C T T C T G C T a G T ACACCGATCCCgTTCTTCTGCTAGTG  
G t T G C C G T T C T T C T G C T a G T ACACCGTTGCCGTTCTTCTGCTAGTG  
G A T G C C G T T g T T C T G C T T G a ACACCGATGCCGTTGTTCTGCTTGTG  
G A T G C C G T T g T T C T G g T T G T ACACCGATGCCGTTGTTCTGGTTGTG  
G A T G C C G T T g T T C a G C T T G T ACACCGATGCCGTTGTTCTGCTTGTG  
G A T G C C G T T g T a C T G C T T G T ACACCGATGCCGTTGTTCTGCTTGTG  
G A T G C C G a T g T T C T G C T T G T ACACCGATGCCGATGTTCTGCTTGTG  
G A T G C g G T T g T T C T G C T T G T ACACCGATGCGGTTGTTCTGCTTGTG  
G A T c C C G T T g T T C T G C T T G T ACACCGATCCCgTTGTTCTGCTTGTG  
G t T G C C G T T g T T C T G C T T G T ACACCGTTGCCGTTGTTCTGCTTGTG  
G t T G C C G T T C T T C T G C T T G a ACACCGTTGCCGTTCTTCTGCTTGTG  
G t T G C C G T T C T T C T G g T T G T ACACCGTTGCCGTTCTTCTGGTTGTG  
G t T G C C G T T C T T C a G C T T G T ACACCGTTGCCGTTCTTCTGCTTGTG  
G t T G C C G a T g T T C T G C T T G T ACACCGTTGCCGATCTTCTGCTTGTG  
G t T G C g G T T C T T C T G C T T G T ACACCGTTGCCGTTCTTCTGCTTGTG  
G t T c C C G T T C T T C T G C T T G T ACACCGTTCCCgTTCTTCTGCTTGTG

AAAACACAAGCAGAAGAACGGCATCG  
AAAACACTGAAGCAGAAGAACGGCATCG  
AAAACACAAGCAGAAGAACGGCATCG  
AAAACACAAGCAGAAGAACGGCATCG  
AAAACACAAGCTCAAGAACGGCATCG  
AAAACACAAGCAGAAGAACGGCATCG  
AAAACACAAGCAGAAGAACGGCATCG  
AAAACACAAGCAGAAGAACGGCATCG  
AAAACACAAGCAGAAGAACGGCATCG  
AAAACACAAGCAGAAGAACGGCATCG  
AAAACACAAGCAGAAGAACGGCATCG  
AAAACACAAGCAGAAGAACGGCAAGG  
AAAACACAAGCAGAAGAACGGGTACG  
AAAACACAAGCAGAAGAACGGGTACG  
AAAACACAAGCAGAAGAACCCGTACG  
AAAACACAAGCAGAAGAAGCCGTACG  
AAAACACAAGCAGAAGATGCCGTACG  
AAAACACAAGCAGAAGTTGCCGTACG  
AAAACACAAGCAGAAGTTGCCGTACG  
AAAACACTACCAGAAGAACGGCATCG  
AAAACACTAGCTGAAGAACGGCATCG  
AAAACACTAGCAGTAGAACGGCATCG  
AAAACACTAGCAGAACAACGGCATCG  
AAAACACTAGCAGAAGATCGGCATCG  
AAAACACTAGCAGAAGAACGGCATCG  
AAAACACTAGCAGAAGAACGGGATCG  
AAAACACTAGCAGAAGAACGGCAACG  
AAAACACTAGCAGAACAACGGCATCG  
AAAACACAACCAGAACAACGGCATCG  
AAAACACAAGCTGAACAACGGCATCG  
AAAACACAAGCAGTACAACGGCATCG  
AAAACACAAGCAGAACAACGGCATCG  
AAAACACAAGCAGAACAACGGCATCG  
AAAACACAAGCAGAACAACGGGATCG  
AAAACACAAGCAGAACAACGGCAACG  
AAAACACTAAGCAGAAGAACGGCAACG  
AAAACACAACCAGAAGAACGGCAACG  
AAAACACAAGCTGAAGAACGGCAACG  
AAAACACAAGCAGTAGAACGGCAACG  
AAAACACAAGCAGAAGATCGGCAACG  
AAAACACAAGCAGAAGAACGGCAACG  
AAAACACAAGCAGAAGAACGGGAACG

**EGFP Target Site 3**

| 20 | 19 | 18 | 17 | 16 | 15 | 14 | 13 | 12 | 11 | 10 | 9 | 8 | 7 | 6 | 5 | 4 | 3 | 2 | 1 | oligonucleotide 1 (5' to 3') | oligonucleotide 2 (5' to 3') |
|----|----|----|----|----|----|----|----|----|----|----|---|---|---|---|---|---|---|---|---|------------------------------|------------------------------|
| G  | G  | T  | G  | G  | T  | G  | C  | A  | G  | A  | T | G | A | A | C | T | T | C | A | ACACCGGTGGTGCAGATGAACTTCAG   | AAAACCTGAAGTTCATCTGCACCACCG  |
| G  | G  | T  | G  | G  | T  | G  | C  | A  | G  | A  | T | G | A | A | C | T | T | C | t | ACACCGGTGGTGCAGATGAACTTCTG   | AAAACAGAAGTTCATCTGCACCACCG   |
| G  | G  | T  | G  | G  | T  | G  | C  | A  | G  | A  | T | G | A | A | C | T | T | g | A | ACACCGGTGGTGCAGATGAACTTGAG   | AAAACCTCAAGTTCATCTGCACCACCG  |
| G  | G  | T  | G  | G  | T  | G  | C  | A  | G  | A  | T | G | A | A | C | T | a | C | A | ACACCGGTGGTGCAGATGAACTACAG   | AAAACCTGTAGTTCATCTGCACCACCG  |
| G  | G  | T  | G  | G  | T  | G  | C  | A  | G  | A  | T | G | A | A | C | a | T | C | A | ACACCGGTGGTGCAGATGAACTACAG   | AAAACCTGATGTTTCATCTGCACCACCG |
| G  | G  | T  | G  | G  | T  | G  | C  | A  | G  | A  | T | G | A | A | g | T | T | C | A | ACACCGGTGGTGCAGATGAACTTCAG   | AAAACCTGAAGTTCATCTGCACCACCG  |
| G  | G  | T  | G  | G  | T  | G  | C  | A  | G  | A  | T | G | A | t | C | T | T | C | A | ACACCGGTGGTGCAGATGATCTTCAG   | AAAACCTGAAGATTCATCTGCACCACCG |
| G  | G  | T  | G  | G  | T  | G  | C  | A  | G  | A  | T | G | t | A | C | T | T | C | A | ACACCGGTGGTGCAGATGTACTTCAG   | AAAACCTGAAGTACATCTGCACCACCG  |
| G  | G  | T  | G  | G  | T  | G  | C  | A  | G  | A  | T | c | A | A | C | T | T | C | A | ACACCGGTGGTGCAGATCAACTTCAG   | AAAACCTGAAGTTGATCTGCACCACCG  |
| G  | G  | T  | G  | G  | T  | G  | C  | A  | G  | A  | a | G | A | A | C | T | T | C | A | ACACCGGTGGTGCAGAAAGAACTTCAG  | AAAACCTGAAGTTCTTCTGCACCACCG  |
| G  | G  | T  | G  | G  | T  | G  | C  | A  | G  | t  | T | G | A | A | C | T | T | C | A | ACACCGGTGGTGCAGTTGAACTTCAG   | AAAACCTGAAGTTCAACTGCACCACCG  |
| G  | G  | T  | G  | G  | T  | G  | C  | A  | c  | A  | T | G | A | A | C | T | T | C | A | ACACCGGTGGTGCACATGAACTTCAG   | AAAACCTGAAGTTCATGTGCACCACCG  |
| G  | G  | T  | G  | G  | T  | G  | C  | t  | G  | A  | T | G | A | A | C | T | T | C | A | ACACCGGTGGTGTCTGATGAACTTCAG  | AAAACCTGAAGTTCATCAGCACCACCG  |
| G  | G  | T  | G  | G  | T  | G  | g  | A  | G  | A  | T | G | A | A | C | T | T | C | A | ACACCGGTGGTGGAGATGAACTTCAG   | AAAACCTGAAGTTCATCTCCACCACCG  |
| G  | G  | T  | G  | G  | T  | c  | C  | A  | G  | A  | T | G | A | A | C | T | T | C | A | ACACCGGTGGTCCAGATGAACTTCAG   | AAAACCTGAAGTTCATCTGGACCACCG  |
| G  | G  | T  | G  | G  | a  | G  | C  | A  | G  | A  | T | G | A | A | C | T | T | C | A | ACACCGGTGGAGCAGATGAACTTCAG   | AAAACCTGAAGTTCATCTGCTCCACC   |
| G  | G  | T  | G  | c  | T  | G  | C  | A  | G  | A  | T | G | A | A | C | T | T | C | A | ACACCGGTGCTGCAGATGAACTTCAG   | AAAACCTGAAGTTCATCTGCAGCACC   |
| G  | G  | T  | c  | G  | T  | G  | C  | A  | G  | A  | T | G | A | A | C | T | T | C | A | ACACCGGTGCTGCAGATGAACTTCAG   | AAAACCTGAAGTTCATCTGCAGCACC   |
| G  | G  | a  | G  | G  | T  | G  | C  | A  | G  | A  | T | G | A | A | C | T | T | C | A | ACACCGGAGGTGCAGATGAACTTCAG   | AAAACCTGAAGTTCATCTGCACCTCC   |
| G  | c  | T  | G  | G  | T  | G  | C  | A  | G  | A  | T | G | A | A | C | T | T | C | A | ACACCGCTGGTGCAGATGAACTTCAG   | AAAACCTGAAGTTCATCTGCACCAGCG  |
| G  | G  | T  | G  | G  | T  | G  | C  | A  | G  | A  | T | G | A | A | C | T | T | g | t | ACACCGGTGGTGCAGATGAACTTGTG   | AAAACACAAGTTCATCTGCACCACCG   |
| G  | G  | T  | G  | G  | T  | G  | C  | A  | G  | A  | T | G | A | A | C | a | a | C | A | ACACCGGTGGTGCAGATGAAACAACAG  | AAAACCTGTTGTTTCATCTGCACCACCG |
| G  | G  | T  | G  | G  | T  | G  | C  | A  | G  | A  | T | G | A | t | g | T | T | C | A | ACACCGGTGGTGCAGATGATGTTTCAG  | AAAACCTGAACATCATCTGCACCACCG  |
| G  | G  | T  | G  | G  | T  | G  | C  | A  | G  | A  | T | c | t | A | C | T | T | C | A | ACACCGGTGGTGCAGATCTACTTCAG   | AAAACCTGAAGTAGATCTGCACCACCG  |
| G  | G  | T  | G  | G  | T  | G  | C  | A  | G  | t  | a | G | A | A | C | T | T | C | A | ACACCGGTGGTGCAGTAGAACTTCAG   | AAAACCTGAAGTTCTACTGCACCACCG  |
| G  | G  | T  | G  | G  | T  | G  | C  | t  | c  | A  | T | G | A | A | C | T | T | C | A | ACACCGGTGGTGTCTCATGAACTTCAG  | AAAACCTGAAGTTCATGAGCACCACCG  |
| G  | G  | T  | G  | G  | T  | c  | g  | A  | G  | A  | T | G | A | A | C | T | T | C | A | ACACCGGTGGTCGAGATGAACTTCAG   | AAAACCTGAAGTTCATCTCGACCACCG  |
| G  | G  | T  | G  | c  | a  | G  | C  | A  | G  | A  | T | G | A | A | C | T | T | C | A | ACACCGGTGCAGCAGATGAACTTCAG   | AAAACCTGAAGTTCATCTGCTGCACC   |
| G  | G  | a  | c  | G  | T  | G  | C  | A  | G  | A  | T | G | A | A | C | T | T | C | A | ACACCGGACGTGCAGATGAACTTCAG   | AAAACCTGAAGTTCATCTGCACGTCCG  |
| G  | c  | a  | G  | G  | T  | G  | C  | A  | G  | A  | T | G | A | A | C | T | T | C | A | ACACCGCAGGTGCAGATGAACTTCAG   | AAAACCTGAAGTTCATCTGCACCAGGG  |
| G  | c  | a  | c  | G  | T  | G  | C  | A  | G  | A  | T | G | A | A | C | T | T | C | A | ACACCGCACGTGCAGATGAACTTCAG   | AAAACCTGAAGTTCATCTGCACGTGCG  |
| G  | c  | a  | c  | c  | T  | G  | C  | A  | G  | A  | T | G | A | A | C | T | T | C | A | ACACCGCACCTGCAGATGAACTTCAG   | AAAACCTGAAGTTCATCTGCAGGTGCG  |
| G  | c  | a  | c  | c  | a  | G  | C  | A  | G  | A  | T | G | A | A | C | T | T | C | A | ACACCGCACCAGCAGATGAACTTCAG   | AAAACCTGAAGTTCATCTGCTGGTGC   |
| G  | c  | a  | c  | c  | a  | c  | C  | A  | G  | A  | T | G | A | A | C | T | T | C | A | ACACCGCACCACCAGATGAACTTCAG   | AAAACCTGAAGTTCATCTGGTGGTGC   |
| G  | c  | a  | c  | c  | a  | c  | g  | A  | G  | A  | T | G | A | A | C | T | T | C | A | ACACCGCACCACGAGATGAACTTCAG   | AAAACCTGAAGTTCATCTCGTGGTGC   |
| G  | c  | a  | c  | c  | a  | c  | g  | t  | G  | A  | T | G | A | A | C | T | T | C | A | ACACCGCACCACGTGATGAACTTCAG   | AAAACCTGAAGTTCATCAGTGGTGC    |
| G  | c  | a  | c  | c  | a  | c  | g  | t  | c  | A  | T | G | A | A | C | T | T | C | A | ACACCGCACCACGTTCATGAACTTCAG  | AAAACCTGAAGTTCATGACGTGGTGC   |
| G  | G  | T  | G  | G  | T  | G  | C  | A  | G  | A  | T | G | A | A | C | T | a | C | t | ACACCGGTGGTGCAGATGAACTACTG   | AAAACAGTAGTTCATCTGCACCACCG   |
| G  | G  | T  | G  | G  | T  | G  | C  | A  | G  | A  | T | G | A | A | g | T | a | C | A | ACACCGGTGGTGCAGATGAACTACAG   | AAAACCTGTACTTCATCTGCACCACCG  |
| G  | G  | T  | G  | G  | T  | G  | C  | A  | G  | A  | T | G | t | A | C | T | a | C | A | ACACCGGTGGTGCAGATGTACTACAG   | AAAACCTGTAGTACATCTGCACCACCG  |
| G  | G  | T  | G  | G  | T  | G  | C  | A  | G  | A  | a | G | A | A | C | T | a | C | A | ACACCGGTGGTGCAGAAAGAACTACAG  | AAAACCTGTAGTTCCTTCTGCACCACCG |

|   |   |   |   |   |   |   |   |   |   |   |   |   |   |   |   |   |   |   |   |                            |                              |
|---|---|---|---|---|---|---|---|---|---|---|---|---|---|---|---|---|---|---|---|----------------------------|------------------------------|
| G | G | T | G | G | T | G | C | A | c | A | T | G | A | A | C | T | a | C | A | ACACCGGTGGTGCACATGAACTACAG | AAAACCTGTAGTTCATGTGCACCACCG  |
| G | G | T | G | G | T | G | g | A | G | A | T | G | A | A | C | T | a | C | A | ACACCGGTGGTGGAGATGAACTACAG | AAAACCTGTAGTTCATCTCCACCACCG  |
| G | G | T | G | G | a | G | C | A | G | A | T | G | A | A | C | T | a | C | A | ACACCGGTGGAGCAGATGAACTACAG | AAAACCTGTAGTTCATCTGCTCCACCAG |
| G | G | T | c | G | T | G | C | A | G | A | T | G | A | A | C | T | a | C | A | ACACCGGTGGTGCAGATGAACTACAG | AAAACCTGTAGTTCATCTGCACCAGCG  |
| G | c | T | G | G | T | G | C | A | G | A | T | G | A | A | C | T | a | C | A | ACACCGCTGGTGCAGATGAACTACAG | AAAACCTGTAGTTCATCTGCACCAGCG  |
| G | G | T | G | G | T | G | C | A | c | A | T | G | A | A | C | T | T | C | t | ACACCGGTGGTGCACATGAACTTCTG | AAAACCTGTAGTTCATGTGCACCACCG  |
| G | G | T | G | G | T | G | C | A | c | A | T | G | A | A | g | T | T | C | A | ACACCGGTGGTGCACATGAAGTTCAG | AAAACCTGAAGTTCATGTGCACCACCG  |
| G | G | T | G | G | T | G | C | A | c | A | T | G | t | A | C | T | T | C | A | ACACCGGTGGTGCACATGTACTTCAG | AAAACCTGAAGTACATGTGCACCACCG  |
| G | G | T | G | G | T | G | C | A | c | A | a | G | A | A | C | T | T | C | A | ACACCGGTGGTGCACAAGAAGTTCAG | AAAACCTGAAGTTCATGTGCACCACCG  |
| G | G | T | G | G | T | G | g | A | c | A | T | G | A | A | C | T | T | C | A | ACACCGGTGGTGGACATGAACTTCAG | AAAACCTGAAGTTCATGTCCACCACCG  |
| G | G | T | G | G | a | G | C | A | c | A | T | G | A | A | C | T | T | C | A | ACACCGGTGGAGCACATGAACTTCAG | AAAACCTGAAGTTCATGTGCTCCACCAG |
| G | G | T | c | G | T | G | C | A | c | A | T | G | A | A | C | T | T | C | A | ACACCGGTGGTGCACATGAACTTCAG | AAAACCTGAAGTTCATGTGCACCAGCG  |
| G | c | T | G | G | T | G | C | A | G | A | T | G | A | A | C | T | T | C | t | ACACCGCTGGTGCAGATGAACTTCTG | AAAACCTGAAGTTCATCTGCACCAGCG  |
| G | c | T | G | G | T | G | C | A | G | A | T | G | A | A | g | T | T | C | A | ACACCGCTGGTGCAGATGAAGTTCAG | AAAACCTGAAGTTCATCTGCACCAGCG  |
| G | c | T | G | G | T | G | C | A | G | A | T | G | t | A | C | T | T | C | A | ACACCGCTGGTGCAGATGTACTTCAG | AAAACCTGAAGTACATCTGCACCAGCG  |
| G | c | T | G | G | T | G | C | A | G | A | a | G | A | A | C | T | T | C | A | ACACCGCTGGTGCAGAAGAAGTTCAG | AAAACCTGAAGTTCATCTGCACCAGCG  |
| G | c | T | G | G | T | G | g | A | G | A | T | G | A | A | C | T | T | C | A | ACACCGCTGGTGGAGATGAACTTCAG | AAAACCTGAAGTTCATCTCCACCAGCG  |
| G | c | T | G | G | a | G | C | A | G | A | T | G | A | A | C | T | T | C | A | ACACCGCTGGAGCAGATGAACTTCAG | AAAACCTGAAGTTCATCTGCTCCAGCG  |
| G | c | T | c | G | T | G | C | A | G | A | T | G | A | A | C | T | T | C | A | ACACCGCTCGTGCAGATGAACTTCAG | AAAACCTGAAGTTCATCTGCACCAGCG  |

**Endogenous Target 1 (VEGFA Site 1):**

|    |    |    |    |    |    |    |    |    |    |    |   |   |   |   |   |   |   |   |   |                              |                              |
|----|----|----|----|----|----|----|----|----|----|----|---|---|---|---|---|---|---|---|---|------------------------------|------------------------------|
| 20 | 19 | 18 | 17 | 16 | 15 | 14 | 13 | 12 | 11 | 10 | 9 | 8 | 7 | 6 | 5 | 4 | 3 | 2 | 1 | oligonucleotide 1 (5' to 3') | oligonucleotide 2 (5' to 3') |
| G  | G  | G  | T  | G  | G  | G  | G  | G  | G  | A  | G | T | T | T | G | C | T | C | C | ACACCGGGTGGGGGGAGTTTGCTCCG   | AAAACGGAGCAAACCTCCCCCACCCG   |

**Endogenous Target 2 (VEGFA Site 2):**

|    |    |    |    |    |    |    |    |    |    |    |   |   |   |   |   |   |   |   |   |                              |                              |
|----|----|----|----|----|----|----|----|----|----|----|---|---|---|---|---|---|---|---|---|------------------------------|------------------------------|
| 20 | 19 | 18 | 17 | 16 | 15 | 14 | 13 | 12 | 11 | 10 | 9 | 8 | 7 | 6 | 5 | 4 | 3 | 2 | 1 | oligonucleotide 1 (5' to 3') | oligonucleotide 2 (5' to 3') |
| G  | A  | C  | C  | C  | C  | C  | T  | C  | C  | A  | C | C | C | C | G | C | C | T | C | ACACCGACCCCTCCACCCCGCCTCG    | AAAACGAGGCGGGGTGGAGGGGGTGC   |

**Endogenous Target 3 (VEGFA Site 3):**

|    |    |    |    |    |    |    |    |    |    |    |   |   |   |   |   |   |   |   |   |                              |                              |
|----|----|----|----|----|----|----|----|----|----|----|---|---|---|---|---|---|---|---|---|------------------------------|------------------------------|
| 20 | 19 | 18 | 17 | 16 | 15 | 14 | 13 | 12 | 11 | 10 | 9 | 8 | 7 | 6 | 5 | 4 | 3 | 2 | 1 | oligonucleotide 1 (5' to 3') | oligonucleotide 2 (5' to 3') |
| G  | G  | T  | G  | A  | G  | T  | G  | A  | G  | T  | G | T | G | T | G | C | G | T | G | ACACCGGTGAGTGAGTGTGTGCGTGG   | AAAACCACGCACACACTCACTCACCG   |

**Endogenous Target 4 (EMX1):**

|    |    |    |    |    |    |    |    |    |    |    |   |   |   |   |   |   |   |   |   |                              |                              |
|----|----|----|----|----|----|----|----|----|----|----|---|---|---|---|---|---|---|---|---|------------------------------|------------------------------|
| 20 | 19 | 18 | 17 | 16 | 15 | 14 | 13 | 12 | 11 | 10 | 9 | 8 | 7 | 6 | 5 | 4 | 3 | 2 | 1 | oligonucleotide 1 (5' to 3') | oligonucleotide 2 (5' to 3') |
| G  | A  | G  | T  | C  | C  | G  | A  | G  | C  | A  | G | A | A | G | A | A | G | A | A | ACACCGAGTCCGAGCAGAAGAAGAAG   | AAAACCTTCTTCTTCTGCTCGGACTCG  |

**Endogenous Target 5 (RNF2):**

|    |    |    |    |    |    |    |    |    |    |    |   |   |   |   |   |   |   |   |   |                              |                              |
|----|----|----|----|----|----|----|----|----|----|----|---|---|---|---|---|---|---|---|---|------------------------------|------------------------------|
| 20 | 19 | 18 | 17 | 16 | 15 | 14 | 13 | 12 | 11 | 10 | 9 | 8 | 7 | 6 | 5 | 4 | 3 | 2 | 1 | oligonucleotide 1 (5' to 3') | oligonucleotide 2 (5' to 3') |
| G  | T  | C  | A  | T  | C  | T  | T  | A  | G  | T  | C | A | T | T | A | C | C | T | G | ACACCGTCATCTTAGTCATTACCTGG   | AAAACCAGGTAATGACTAAGATGACC   |

**Endogenous Target 6 (FANCF):**

|    |    |    |    |    |    |    |    |    |    |    |   |   |   |   |   |   |   |   |   |                              |                              |
|----|----|----|----|----|----|----|----|----|----|----|---|---|---|---|---|---|---|---|---|------------------------------|------------------------------|
| 20 | 19 | 18 | 17 | 16 | 15 | 14 | 13 | 12 | 11 | 10 | 9 | 8 | 7 | 6 | 5 | 4 | 3 | 2 | 1 | oligonucleotide 1 (5' to 3') | oligonucleotide 2 (5' to 3') |
| G  | G  | A  | A  | T  | C  | C  | C  | T  | T  | C  | T | G | C | A | G | C | A | C | C | ACACCGGAATCCCTTCTGCAGCACCG   | AAAACGGTGCTGCAGAAGGGATTCCG   |
