# Supplementary material
Source: PubMed Central journal article supplement (PMC3773023)
Supplement: NIHMS488397-supplement-table_2.pdf [file NIHMS488397-supplement-table_2.pdf]

| Publication ID | Expected Off-Target Sequences (Expected) - HS GRCh37         | Mismatches in target compared to on-target site | Actual Target in U2OS.EGFP cells (if different, variances in orange text) | Forward PCR Primer                | Reverse PCR Primer                 | PCR Conditions               | Watson-Crick Transversions | non-Watson-Crick Transversions | Transitions |
|----------------|--------------------------------------------------------------|-------------------------------------------------|---------------------------------------------------------------------------|-----------------------------------|------------------------------------|------------------------------|----------------------------|--------------------------------|-------------|
| Target 1       | GGGTGGGGGAGTTTGTCTCCGG                                       | 0                                               |                                                                           | TCCAGATGGCACCATTGTCAG             | AGGGAGCAGGAAAGTGAGGT               | DMSO                         |                            |                                |             |
| OT1-1          | GGGTGGGGGAGTTTGC <del>CC</del> AGG                           | 1                                               |                                                                           | GGGGCCCACTTCTTCCAT                | ACCCAGACTCCTGGTGTGGC               | No DMSO                      | 0                          | 0                              | 1           |
| OT1-2          | G <del>C</del> TGGGGGGT <del>T</del> TTGCTC <del>C</del> CGG | 2                                               |                                                                           | GCTAAGCAGAGATGCCTATGCC            | ACCACCC <del>T</del> TCCCCCAGAAA   | DMSO                         | 2                          | 0                              | 0           |
| OT1-3          | GGATGGA <del>GG</del> GAGTTTGTCTC <del>C</del> TGG           | 2                                               |                                                                           | ACCCACAGCCAGGTTTTC                | GAATCACTGCACCTGGCCATC              | DMSO                         | 0                          | 0                              | 2           |
| OT1-4          | GGGAGGGT <del>G</del> GAGTTTGTCTC <del>C</del> TGG           | 2                                               |                                                                           | TGCGGCAACTT <del>C</del> AGACAACC | TAAAGGGCGTGTGGGAGAG                | DMSO                         | 1                          | 1                              | 0           |
| OT1-5          | GGGTGGGTGGAGTTTGTCTACTGG                                     | 2                                               |                                                                           | GCATGTCAGGATCTGACCCC              | TGCAGGGCCATCTTGTGTGT               | DMSO                         | 0                          | 2                              | 0           |
| OT1-6          | CGGGGAGGGAGTTTGTCTC <del>C</del> TGG                         | 3                                               |                                                                           | CCACCACATGTTCTGGGTGC              | CTGGTCTGTTCCTGTGGG                 | DMSO                         | 1                          | 1                              | 1           |
| OT1-7          | GAGTGGGTGGAGTTTGTCTAC <del>AG</del> G                        | 3                                               |                                                                           | GGCTCTCCCTGCCCTAGTTT              | GCAGGTCAAGTTGGAACCCG               | DMSO                         | 0                          | 2                              | 1           |
| OT1-8          | GGGAGGGGAGAGTTTGTCTCCAGG                                     | 3                                               |                                                                           | GGGGCTGAGAACACATGAGATGCA          | AGATTGTGCTACTGCTTCGCCT             | DMSO                         | 1                          | 0                              | 2           |
| OT1-9          | GGGAGGGG <del>G</del> CAGTTTGTCTCCAGG                        | 3                                               |                                                                           | CCCGACCTCCGCTCCAAAGC              | GGACCTGTGCACCCCTGGC                | DMSO                         | 2                          | 1                              | 0           |
| OT1-10         | GGGAGGGG <del>G</del> GAGTTTGTCTCCAGG                        | 3                                               |                                                                           | TGCAAGGTGCGATAGTCCCA              | CAGGAGGGGGAAGTGTGTCC               | DMSO                         | 1                          | 1                              | 1           |
| OT1-11         | GGGGAGGGGAGTTTGTCTC <del>C</del> TGG                         | 3                                               |                                                                           | GCCCATCTTTTTGTCAGTGGGA            | GAGAGCAAGTTGTTC <del>C</del> CCAGG | DMSO                         | 0                          | 1                              | 2           |
| OT1-12         | GGGGTGGGGACTTTGTCTCCAGG                                      | 3                                               |                                                                           | GCCCCAGCCCTCTGTTC                 | GCTGCTGGTAGGGGAGCTGG               | DMSO                         | 1                          | 2                              | 0           |
| OT1-13         | GGGTG <del>C</del> GGGGGAGTGG <del>C</del> TCCAGG            | 3                                               |                                                                           | CGGCTGCCTTCCCTGAGTCC              | GGGTGACGCTTGCCATGAGC               | 72C Anneal, 3% DMSO          | 1                          | 2                              | 0           |
| OT1-14         | GGGTGGCTGGAGTTTGTCTGCTGG                                     | 3                                               |                                                                           | TGACCTGGAGTACAAAATGTTCCCA         | GCTGAGACAACCAGCCAGGT               | 72C Anneal, 3% DMSO          | 2                          | 1                              | 0           |
| OT1-15         | GGGTGGGGG <del>T</del> GCTGCTCCAGG                           | 3                                               |                                                                           | TGCCTCCACCCCTTAGCCCTG             | TGGCCGATCCCACTGGG                  | DMSO                         | 1                          | 0                              | 2           |
| OT1-16         | GGTTGAGGGGAGTCTGCTCCAGG                                      | 3                                               |                                                                           | AACTCAGGACAACTGCCTGT              | CCCAGGAGCAGGGTACAAATGC             | DMSO                         | 0                          | 1                              | 2           |
| OT1-17         | GTGTGGTGGCTTTGTCTCCAGG                                       | 3                                               |                                                                           | TCCTCCTTGGAGGGGGCCC               | CCTTGGAGGGGGCCTTGGTGG              | DMSO                         | 0                          | 3                              | 0           |
| OT1-18         | AGGTGGTGGGAGCTTGTCTC <del>C</del> TGG                        | 4                                               |                                                                           | CCGAGGGCATGGGCAATCCT              | GGCTGCTGCGAGTTGCCAAC               | DMSO                         | 0                          | 1                              | 3           |
| OT1-19         | AGTTGGGGGAGTTTGC <del>CC</del> AGG                           | 4                                               |                                                                           | TGCTTTGCATGGGGTCTCAGACA           | GGGTGCTTGCCTTGTGTGT                | DMSO                         | 0                          | 2                              | 2           |
| OT1-20         | ATGTGTGGGGAATTTGTCTCCAGG                                     | 4                                               |                                                                           | AGCTCCTTCTATTCTCTCTGTGCTGT        | CACAGAAGGATGTGTGCAGGTT             | DMSO                         | 0                          | 2                              | 2           |
| OT1-21         | CAGTGGGGGAGCTTTCTC <del>C</del> TGG                          | 4                                               |                                                                           | AGCAGACACAGGTAATGCTGCT            | GGTCAGGTTGTGTCTGTTAGGA             | DMSO                         | 1                          | 1                              | 2           |
| OT1-22         | GAGGGGAGCAGTTTGTCTCCAGG                                      | 4                                               |                                                                           | CCTGTGGGGCTCTCAGGTGC              | ACTGCCTGCCAAAGTGGGTGT              | No DMSO TD                   | 1                          | 1                              | 2           |
| OT1-23         | GGAGGAGGGGAGTCTGCTCCAGG                                      | 4                                               |                                                                           | AGCTGCACCTGGGGAATGAGT             | TGCCGGGTAATAGCTGGCTT               | DMSO                         | 0                          | 1                              | 3           |
| OT1-24         | GGAGGGGG <del>C</del> CTTTTGTCTCCAGG                         | 4                                               |                                                                           | CCAGCCTGGGCAACAAGCG               | GGGGCTTCCAGGTCACAGG                | 72C Anneal, 3% DMSO, 6% DMSO | 0                          | 3                              | 1           |
| OT1-25         | GGGCAAGGGGAGTTGTCTC <del>C</del> TGG                         | 4                                               |                                                                           | TACCCCCACTGCCCATTTGC              | ACAGGTCCATGCTTAGCAGAGGG            | DMSO                         | 0                          | 1                              | 3           |
|                |                                                              |                                                 | GGGTGATTGAAGTTTGTCTCCAGG<br>GGGTGATTGAAGTTTGTCTCCAGG                      |                                   |                                    |                              |                            |                                |             |
| OT1-26         | GGGTGATTGAAGTTTGTCTCCAGG                                     | 4                                               |                                                                           | ACGGATTACAGACGGAGGTGC             | CCGAGTCCGTTGCAGAGAGC               | DMSO                         | 0 / 1                      | 2                              | 2           |
| OT1-27         | GGGTGTTGGGGTCAATTGTCTCCAGG                                   | 4                                               |                                                                           | TGTGGTTGAAGTAGGGGACAGGT           | TGGCCCAATTGGAAAGTATTTCGT           | DMSO                         | 3                          | 1                              | 0           |
| OT1-28         | GGTGGGGTGGGTTTGTCTC <del>C</del> TGG                         | 4                                               |                                                                           | TGGGATGGCAGAGTCATCAACGT           | GGCCCAATCGGTAGAGGATGCA             | DMSO                         | 0                          | 3                              | 1           |
| OT1-29         | GTTGGGGTAGAGTTTGTCTCCAGG                                     | 4                                               |                                                                           | ATGGGGCGCTCCAGTCTGTG              | TGCACCCACACAGCCAGCAA               | DMSO                         | 0                          | 3                              | 1           |
| OT1-30         | TAGTGGAGGGAGCTTGTCTC <del>C</del> TGG                        | 4                                               |                                                                           | GGGAGGGAGGACAGGGAA                | AATTAGCTGGGCGCGTGGT                | 72C Anneal, 3% DMSO          | 0                          | 1                              | 3           |
| OT1-31         | TGCTCGGGGAGTTTGCACCAGG                                       | 4                                               |                                                                           | ATCCCCGTGAGGAAGTCGCC              | CAGGCCGCCCCCTGAGGAAT               | DMSO                         | 3                          | 1                              | 0           |
| OT1-32         | TGGAGAGGGGAGTTGCTC <del>C</del> TGG                          | 4                                               |                                                                           | CCCCAACCCCTTGGCTCAGCG             | TGAGGAGAACCACAGGCAGA               | DMSO                         | 1                          | 2                              | 1           |
| OT1-33         | TGGTGTGGGAGTCTGCTCCAGG                                       | 4                                               |                                                                           | ATCGACGAGGAGGGGGCCTT              | CCCCTCACTAAGCAGGCCC                | DMSO                         | 0                          | 3                              | 1           |
| OT1-34         | TTGGGGGGCAGTTTGTCTC <del>C</del> TGG                         | 4                                               |                                                                           | TGCTCAAGGGGCTGTCCA                | CAGGGGAGTGGCAGGAGTC                | No DMSO                      | 1                          | 3                              | 0           |
| OT1-35         | AAGTAAGGGAAGTTTGTCTC <del>C</del> TGG                        | 5                                               |                                                                           | TGCCTGGCAGCAGTAGGTG               | GGGAAAGGGGAAAGGTGCA                | DMSO                         | 0                          | 0                              | 5           |
| OT1-36         | AGAAGAGGGGATTTGTCTC <del>C</del> TGG                         | 5                                               |                                                                           | Not optimized                     |                                    |                              | 1                          | 1                              | 3           |
| OT1-37         | ATCTGGGGTGTATTGTCTC <del>C</del> TGG                         | 5                                               |                                                                           | ACCTGGGCTTGCCTAGGG                | GCTGCTCGAGTTAAGCACCA               | DMSO                         | 1                          | 3                              | 1           |
| OT1-38         | CTCTGGTGGGAGTTTGTCTC <del>C</del> TGG                        | 5                                               |                                                                           | GTGGCCGGGCTACTGCTACC              | GGTTCCCAAGCTGGGGGCA                | DMSO                         | 3                          | 2                              | 0           |
| OT1-39         | CTGGTGGGGAGCTTGTCTCCAGG                                      | 5                                               |                                                                           | Not optimized                     |                                    |                              | 1                          | 3                              | 1           |
| OT1-40         | CTTTCGGGGGAGTTTGC <del>C</del> CCGG                          | 5                                               |                                                                           | GCAAGAGGGGAGGAGACCC               | AGAGTCACTCCATTTCTGGGGGC            | DMSO                         | 2                          | 3                              | 0           |
| OT1-41         | CTTTGGGGTAGTTTGTCTC <del>C</del> TGG                         | 5                                               |                                                                           | GGGGTCAAGTTGATATCCCCCT            | AGGGAAATCCTTTTCCATTGCTGTGT         | 1M betaine, TD               | 1                          | 4                              | 0           |
| OT1-42         | GCTCTGGGGTAGTTTGTCTCCAGG                                     | 5                                               |                                                                           | AGAGAGGCCACGTTGGAGGT              | GCCTCCCCTCTCTCCCA                  | DMSO                         | 1                          | 3                              | 1           |
| OT1-43         | GTCTCTCGGGAGTTTGTCTCCGG                                      | 5                                               |                                                                           | GACAGTGCCTTGCATGCAC               | TCTGACCGGTATGCTGACG                | DMSO                         | 3                          | 2                              | 0           |
| OT1-44         | TCCTGAGGGCAGTTTGTCTCCAGG                                     | 5                                               |                                                                           | TGTGTGAACGAGCCTGGCT               | TGGTCTAGTACTTCTCCAGCCTT            | DMSO                         | 3                          | 1                              | 1           |
| OT1-45         | TCTTTGGGAGAGTTTGTCTCCAGG                                     | 5                                               |                                                                           | GGTCTCCCTTGGCTCCTGTGA             | CCCCTGCTCCTAGCCCTGC                | DMSO                         | 1                          | 3                              | 1           |
| OT1-46         | ACAAC <del>T</del> GGGGAGTTTGTCTC <del>C</del> TGG           | 6                                               |                                                                           | TGAAGTCAACAATCTAAGCTTCCACCT       | AGCTTGGTAGTTGGAGTCTTTGAAG          | DMSO                         | 3                          | 1                              | 2           |
| OT1-47         | ACAAGGTTGAAGTTTGTCTC <del>C</del> TGG                        | 6                                               |                                                                           | TGATTGGGGTGCAGTTTCTGTACA          | GCAACGCTGCCCTTGGAA                 | DMSO                         | 2                          | 1                              | 3           |
| OT1-48         | ACATAGAGGAGTTTGTCTCCAGG                                      | 6                                               |                                                                           | TCCATGGGGCCTCTGAAAGA              | AGCGGCTTCTGCTTCTGCCA               | DMSO                         | 1                          | 0                              | 5           |
| OT1-49         | AGACCCAGGGAGTTTGTCTCCCGG                                     | 6                                               |                                                                           | GCGGTTGGTGGGGTTGTATGC             | GAGTTCCTCCCCGCCAGT                 | DMSO                         | 2                          | 0                              | 4           |
| OT1-50         | AGACCCAGGGAGTTTGTCTCCCGG                                     | 6                                               |                                                                           | AGGCAAGATTTCCAGTGTGCAAGA          | GCTTTGGCTGGGACTCCGC                | DMSO                         | 2                          | 0                              | 4           |
| OT1-51         | CACGGAGGGGTTTGTCTC <del>C</del> TGG                          | 6                                               |                                                                           | GCTGTGGTGGGCTCTCTG                | GCTGTGCCCCTTCCCCTGG                | No DMSO TD                   | 3                          | 1                              | 2           |
| OT1-52         | CAGAGCTTGGAGTTTGTCTCCAGG                                     | 6                                               |                                                                           | GCTGCGAGGCTTCCGTGAGA              | CGCCCTAGAGCTAAGGGGGT               | DMSO                         | 3                          | 2                              | 1           |
| OT1-53         | CTATTGATGGAGTTTGTCTC <del>C</del> TGG                        | 6                                               |                                                                           | CCAGGACCTGAGAGCTGCC               | AGGGCTAGGACTGCAGTGCAGT             | DMSO                         | 1                          | 3                              | 2           |
| OT1-54         | CTTTCTAGGGAGTTTGTCTC <del>C</del> TGG                        | 6                                               |                                                                           | CTGTGCTCAGCCCTGGGTGCT             | GCCTGGGGCTGTGAGTAGTTT              | DMSO                         | 2                          | 3                              | 1           |
| OT1-55         | GCCATGCTGGAGTTTGTCTCCAGG                                     | 6                                               |                                                                           | AGCTCGGCCAGATCTGTGG               | ACTTGGCAGGCTGAGGCAGG               | 72C Anneal, 3% DMSO          | 4                          | 2                              | 0           |
| Target 2       | GACCCCTCCACCCCGCTCCGG                                        | 0                                               |                                                                           | AGAGAAGTCGAGGAAAGAGAG             | CAGCAGAAAGTTCATGGTTTCG             | DMSO                         |                            |                                |             |
| OT2-1          | GACCCCTCCACCCCGCTCCGG                                        | 2                                               |                                                                           | TGGACAGTGCAGTACTCCCTG             | ACTGATCGATGATGGCCTATGGGT           | DMSO                         | 0                          | 0                              | 2           |
| OT2-2          | GGCCTCCACCCCGCTCTGG                                          | 2                                               |                                                                           | CAAGATGTGCACCTGGGCTA              | GCAGCCTATTGTCTCCTGGT               | DMSO                         | 1                          | 0                              | 1           |
| OT2-3          | AACCCCTCCACCCCGCTCCAGG                                       | 3                                               |                                                                           | GTCCAGTGCCTGACCTGGC               | AGCATCATGCCTCCAGCTTCA              | DMSO                         | 1                          | 1                              | 1           |
| OT2-4          | CACCCCTCAACACCCGCTCCAGG                                      | 3                                               |                                                                           | GCTCCGATCCTCTGCCACC               | GCAGCTCCCAACCCCTCAG                | DMSO                         | 1                          | 2                              | 0           |
| OT2-5          | CACCCCTCCCCTCCGCTCCAGG                                       | 3                                               |                                                                           | GGGGACAGGCAGGCAAGGAG              | GTGCTGTCCGTTCCACCCCT               | DMSO                         | 1                          | 1                              | 1           |
| OT2-6          | CTACCCCTCCACCCCGCTCCGG                                       | 3                                               |                                                                           | AAGGGGCTGGGGTAGGAC                | CGTGATTCAGTTCTCCGGCA               | DMSO                         | 2                          | 1                              | 0           |
| OT2-7          | GACCCCGCCCGCCCGCTCTGG                                        | 3                                               |                                                                           | GACCTCAGGAAGCTGGGAG               | CTGCGAGATGCCCAATCG                 | 1M betaine, TD               | 1                          | 0                              | 2           |
| OT2-8          | GATCGACTCCACCCGCTCTGG                                        | 3                                               |                                                                           | CCGGGCGCTCTGCTAGA                 | TGTGGGATTACAGGCGCGA                | DMSO                         | 1                          | 1                              | 1           |
| OT2-9          | GCCCCACCCACCCCGCTCTGG                                        | 3                                               |                                                                           | CAAGTGGTGTGACGGGAGG               | TGCCTGGCCTCTCTGAGTCT               | DMSO                         | 0                          | 2                              | 1           |
| OT2-10         | GCCCCGCTCCTCCCGCTCCGG                                        | 3                                               |                                                                           | CGACTCCAGGCTCTCAGG                | CAGCGAGTCCAGCCGATG                 | 1M betaine, TD               | 2                          | 1                              | 0           |
| OT2-11         | GGCCCTCCACCGCTCCAGG                                          | 3                                               |                                                                           | CTTCCCTCCCAAGCACCAC               | GCTACAGGTTGCACAGTGAAGGT            | DMSO                         | 1                          | 1                              | 1           |
| OT2-12         | GGCCCTCCCTCCTCCGCTCTGG                                       | 3                                               |                                                                           | CCCCGGGAGTCTGTCTGA                | CCCAGCCGTTCCAGTCTCC                | 72C Anneal, 3% DMSO          | 1                          | 0                              | 2           |
| OT2-13         | GGCCCTCCACCTGCCTCCGG                                         | 3                                               |                                                                           | GAAGCGGAAAACCCGGCTC               | TCCAGGCTCTCTCGGCCC                 | DMSO                         | 1                          | 0                              | 2           |

|          |                             |   |                             |                            |                     |   |   |   |
|----------|-----------------------------|---|-----------------------------|----------------------------|---------------------|---|---|---|
| OT2-14   | GTCTCCACCACCCCGCTTGG        | 3 | AGGGTGGTCTGAGGAGGCTT        | CATGGGGCTGGACCTCGTC        | DMSO                | 2 | 0 | 1 |
| OT2-15   | TACCCCAACCCCGCCTTGG         | 3 | GGGAAAGAGGAGGCTGTCG         | TGCCAGGAAGGAAGCTGGCC       | 72C Anneal, 3% DMSO | 0 | 2 | 1 |
| OT2-16   | AACCCATTCCACCCTGCCTCAGG     | 4 | GAGTGACGATGAGCCCGGG         | CCCTAGCTGACGTCGCCCC        | 68C Anneal, 3% DMSO | 0 | 1 | 3 |
| OT2-17   | ACACCCCAACCCCGCCTCAGG       | 4 | CCCATGAGGGTITAGTGC          | TGAAGATGGGCTGTTGGGG        | DMSO                | 0 | 2 | 2 |
| OT2-18   | AGCCCCACTCCCGCCTCGGG        | 4 | CACCTGGGCGATCTGGGTTG        | ACTGGGTTGGGAGGGGGAT        | DMSO                | 2 | 0 | 2 |
| OT2-19   | ATTCCCCCAACCCCGCCTCAGG      | 4 | TCATGATCCCCAAAGGGCT         | CCATTTGTGCTGATCTGTGGT      | DMSO                | 1 | 0 | 3 |
| OT2-20   | CCCCACCCCAACCCCGCCTCAGG     | 4 | TGGTCCCAGAAATAGTGCCA        | AGGAAATGTTGTGCCAGGGC       | DMSO                | 1 | 2 | 1 |
| OT2-21   | CCCCCAACCCCGCCTCGGG         | 4 | GCCTCAGACCAACCTGCCCC        | GCCAAAGTTACTCATCAAGAAAGTG  | No DMSO TD          | 2 | 1 | 1 |
| OT2-22   | CCCCCAACCCCGCCTCAGG         | 4 | GCCGGGACAAGACTGAGTTGGG      | TCCCAACTCCCGCAAAACG        | DMSO                | 1 | 2 | 1 |
| OT2-23   | CGCCCTCCCAACCCCGCCTCGGG     | 4 | TGCTCAGGTTGTTCCGGAG         | CTGGAACCCGATCCTCCGCA       | No DMSO TD          | 1 | 0 | 3 |
| OT2-24   | CTCCCAACCCCGCCTCAGG         | 4 | ACACTGGTCCAGTCCCGTCT        | GGTGTGCCCTCCGATGGAA        | DMSO                | 2 | 1 | 1 |
| OT2-25   | CTCTCCCCCAACCCCGCCTTGG      | 4 | ATCGCGCCAAAGCACAGGT         | AGGCTTCTGGAAAAGTCCTCAATGCA | DMSO                | 3 | 0 | 2 |
| OT2-26   | GCCTCTGTGACCCCGCCTCAGG      | 4 | Not optimized               |                            |                     | 1 | 1 | 2 |
| OT2-27   | GTAACCTCCCAACCCCGCCTTGG     | 4 | CCCTATGGTGGTCTTACGGCA       | AGCCACATCTTCTTGTAGGG       | DMSO                | 1 | 1 | 2 |
| OT2-28   | TGCCCTCCCAACCCCGCCTTGG      | 4 | TGCTCAGGTTGTTCCGGAG         | AGGGTGGGTTGACTGGCTCA       | DMSO                | 0 | 3 | 1 |
| OT2-29   | TGCCCTCCCAACCCCGCCTTGG      | 4 | GAGCTGAGACGGCACCACTG        | TGGCTTGAACCTTGGGCT         | 1M betaine, TD      | 0 | 1 | 3 |
| OT2-30   | TTCCCCAACCCCGCCTCAGG        | 4 | Not optimized               |                            |                     | 1 | 2 | 1 |
| OT2-31   | TTCTCCCTCCTCCCGCCTCGGG      | 4 | AGTGAGAGTGGCACGAACCA        | CAGTAGGTGGTCCCTCCGC        | DMSO                | 2 | 1 | 1 |
| OT2-32   | ACCCTCGCCCAACCCCGCCTCAGG    | 5 | Not optimized               |                            |                     | 1 | 1 | 3 |
| OT2-33   | AGCCAACCCCAACCCCGCCTTGG     | 5 | GGGAGAACCTTGTCCAGCT         | AAGCCGAAAAGCTGGGCAAA       | DMSO                | 0 | 2 | 3 |
| OT2-34   | AGGCCCCCAACCCCGCCTCAGG      | 5 | CTTCCAGTGTCGCCGTCC          | ACACAGTCAGAGTCCCGCCG       | DMSO                | 1 | 1 | 3 |
| OT2-35   | AGGCCCCCGCCCCGCTCAGG        | 5 | Not optimized               |                            |                     | 1 | 0 | 4 |
| OT2-36   | ATCTGCCCAACCCCGCCTCGGG      | 5 | CTGAGAGGGGGAGGGGAGG         | TCGACTGGTCTTGCCTCCCA       | 68C Anneal, 3% DMSO | 3 | 0 | 2 |
| OT2-37   | CATCTCCCAACCCCGCCTTGG       | 5 | CAGCCTGTGCATCGGAAAA         | TGCAGCCAAGAGAAAAGCCT       | 1M betaine, TD      | 1 | 0 | 4 |
| OT2-38   | CTTTCCCTCCCAACCCCGCCTG      | 5 | TCCCTTGCACCCGAACCCA         | ACCCGACTCTCCCCATTGC        | DMSO                | 2 | 1 | 2 |
| OT2-39   | GTCGAGGTCACCCCGCCTCAGG      | 5 | TGGGGTTCGCTGCTGTCA          | GCCAGGAGACACAGGACC         | DMSO                | 4 | 1 | 0 |
| OT2-40   | GTCGAGGTCACCCCGCCTCAGG      | 5 | ATCAGGTGCCAGGAGACAC         | GGCCTGAGAGTGGAGAGTGG       | DMSO                | 4 | 1 | 0 |
| OT2-41   | TCAGAACCCTCCCAACCCCGCCTCAGG | 5 | Not optimized               |                            |                     | 1 | 4 | 0 |
| OT2-42   | TGCAACCTCCTCCCGCCTCGGG      | 5 | TGAGCCACATGAATCAAGGCTCC     | ACCTCTCAAGTCTCAGTAACTCTCT  | DMSO                | 1 | 3 | 1 |
| OT2-43   | ACCAGTCTGCCACCCCGCCTTGG     | 6 | GGTCCCTGTGAGTGGA            | CTTTGGTGGACCTGCACAGC       | DMSO                | 2 | 2 | 2 |
| OT2-44   | ACTACCACTCCCGCCTCAGG        | 6 | GCGAGGTGTGCTGACTTCCCT       | GCTGGGACTACAGACATGTGCCA    | DMSO                | 2 | 2 | 2 |
| OT2-45   | ATTTCCCCCAACCCCGCCTCAGG     | 6 | ATTGACGGCTGTCCAGGCA         | AAATCCTGCATGGTATGGGAGT     | DMSO                | 1 | 1 | 5 |
| OT2-46   | CCACCATCCACCCCGCCTTGG       | 6 | TGCTCTGCCATTTATGCTATGAAC    | ACAGCCTCTTCTCCATGACTGAGC   | DMSO                | 1 | 3 | 2 |
| OT2-47   | CCCAAGCCCACCCCGCCTCGGG      | 6 | TCCGCAAAACAGGAGGAGC         | GCGGTGGGAAAGCCATTGAG       | DMSO                | 2 | 3 | 1 |
| OT2-48   | CGGCGCTTCCCGCCTCAGG         | 6 | GGGGTCTGCTCAGTGGGA          | CCTGCGGGAGAGTGCCTGC        | DMSO                | 3 | 1 | 2 |
| OT2-49   | CCTGCCATGACCCCGCCTCAGG      | 6 | TCCTGGTTCATTGCTAGAACTCTGGA  | ACTCCAGATGCAACAGGGCT       | DMSO                | 3 | 2 | 1 |
| OT2-50   | CTGCCCTCCCAACCCCGCCTCAGG    | 6 | CGTGTGGTGGCTGAGTCT          | GCTTACCCTAGAGGCTGCT        | DMSO                | 3 | 0 | 3 |
| OT2-51   | TCTTCTTCCACCCCGCCTCAGG      | 6 | AGGCCCTGATAATTCATGCTACAA    | TCAGTGACAACCTTTGATTCGGCA   | DMSO                | 0 | 2 | 4 |
| OT2-52   | TTGACCCCGCCTCGGG            | 6 | Not optimized               |                            |                     | 2 | 2 | 2 |
| Target 3 | GGTGAGTGAGTGTCGCTGTTGG      | 0 | TCCAGATGGCACATTGTCCAG       | AGGGAGCAGGAAAGTGAGGT       | DMSO                |   |   |   |
| OT3-1    | GGTGAGTGAGTGTCGCTGTTGG      | 1 | GCAGGCAAGTGTCAAGGCT         | CACCGACACCCCACTACC         | DMSO                | 0 | 0 | 1 |
| OT3-2    | AGTGAGTGAGTGTCGCTGTTGG      | 2 | GAGGGGGAAGTACCGACAA         | TACCCGGCCGCTGTTAGA         | DMSO                | 0 | 0 | 2 |
| OT3-3    | AGTGTGAGTGTCGCTGTTGG        | 2 | GACACCCACACACTCCTATGC       | TGAATCCCTTACCCCCAAG        | DMSO                | 1 | 0 | 1 |
| OT3-4    | GCTGAGTGAGTGTCGCTGTTGG      | 2 | TCCTTTGAGGTTTACCCCC         | CCAATCCAGGATGATCCGC        | DMSO                | 1 | 0 | 1 |
| OT3-5    | GGTGAGTCACTGTGTAGTGGG       | 2 | CAGGGCCAGGAACACAGGAA        | GGGAGGTATGTGCGGGAGT        | DMSO                | 1 | 1 | 0 |
| OT3-6    | GGTGAGTGAGTGTCGCTGTTGG      | 2 | TGCAGCCTGAGTGAGCAAGTGT      | GCCCAGGTGCTAAGCCCCC        | DMSO                | 1 | 0 | 1 |
| OT3-7    | GGTGAGTGAGTGTCGCTGTTGG      | 2 | TACAGCCTGGTGTAGGAGC         | TGTGTCATGGACTTCCCATTTG     | 1M betaine, TD      | 1 | 1 | 0 |
| OT3-8    | GGTGAGTGAGTGTCGCTGTTGG      | 2 | GGCAGGCATTAACATCAGGTCC      | TCTCCCCAAGGATCAGAGCT       | DMSO                | 1 | 1 | 0 |
| OT3-9    | GGTGAGTGAGTGTCGCTGTTGG      | 2 | GGGCCTCCCTGCTGGTTCT         | GCTGCGGCCGAAACCAAGA        | DMSO                | 0 | 1 | 1 |
| OT3-10   | GGTGAGTGTCGCTGAGTGGG        | 2 | ACAAACGACAGGTGACCAGAA       | ACTCCGAAAATGCCCCGAGT       | DMSO                | 1 | 1 | 0 |
| OT3-11   | GGTGAGTGTCGCTGATGTTGG       | 2 | AGGGGAGGGGACATTGCTT         | TTGAGAGGGTTCAAGGTTGC       | DMSO                | 1 | 0 | 1 |
| OT3-12   | GGTGAGTGAGTGTCGCTGTTGG      | 2 | CTAATGCTTACGGCTGCGGG        | AGCCAACGGCAGATGCAAT        | DMSO                | 1 | 0 | 1 |
| OT3-13   | GGTGAGTGTCGCTGAGTGGG        | 2 | GAGCGAAGTTAACCCACCGC        | CACACATGCACATGCCCTG        | 68C, 3% DMSO        | 2 | 0 | 0 |
| OT3-14   | GGTGAGTGTCGCTGAGTGGG        | 2 | GCATGTGTCTAACTGGAGACAATAGCA | TCCCCATATCAACACACACA       | DMSO                | 2 | 0 | 0 |
| OT3-15   | GGTGAGTGTCGCTGAGTGGG        | 2 | GCCCCTCCGCTTTTGTG           | TGGGCAAAGGACATGAAACAGACA   | DMSO                | 2 | 0 | 0 |
| OT3-16   | GGTGAGTGTCGCTGAGTGGG        | 2 | GCCTCAGCTGTCTTAAGCCC        | ACGAACAGATCATTTCATGGCTTCC  | DMSO                | 2 | 0 | 0 |
| OT3-17   | GTTAGTGAATGTCGCTGAGG        | 2 | CTCCAGAGCTGGCCTACCA         | CCCTCTCCGGAAGTGCCTTG       | DMSO                | 0 | 1 | 1 |
| OT3-18   | TGTGGTGAGTGTCGCTGAGG        | 2 | TCTGTACACACAGTACCACC        | GTTCCTGGGGATGGGGAT         | DMSO                | 0 | 1 | 1 |
| OT3-19   | ACTGTGAGTGTCGCTGAGG         | 3 | GGGGACCCTCAAGAGGCACT        | GGGCATCAAAGATGGGGAT        | DMSO                | 2 | 0 | 1 |
| OT3-20   | AGAGAGTGAGTGTCGCTGAGG       | 3 | TGTGGAGGGTGGGACCTGGT        | ACAGTGAGGTCGCTTTGGG        | DMSO                | 1 | 0 | 2 |
| OT3-21   | AGCGAGTGGTGTCGCTGGGG        | 3 | CGGGGTGGCAGTGACGTCAA        | GGTGAGTCCAAGAGCCCCC        | DMSO                | 0 | 0 | 3 |
| OT3-22   | AGGGAGTCACTGTCGCTGTTGG      | 3 | AGCTGAGGCAGAGTCCCCGA        | GGGAGACAGAGCAGGCCTC        | DMSO                | 1 | 1 | 1 |
| OT3-23   | AGTGAGTGAGTGAGTGGTGGG       | 3 | ACCACCAGACCCCACTCCA         | AGGACGACTTGTGCCCATTC       | 72C Anneal, 3% DMSO | 1 | 1 | 1 |
| OT3-24   | CATGAGTGAGTGTCGCTGTTGG      | 3 | GGGTGAGGACGAGTCCAGA         | TCCACCCCACTCCATCCT         | 72C Anneal, 3% DMSO | 2 | 0 | 1 |
| OT3-25   | CGTGAGTGTCGCTGAGTGGG        | 3 | ACACTGTTGGTGTGCTGGGA        | GCCCTCACCACATGATGCT        | DMSO                | 2 | 0 | 1 |
| OT3-26   | GACTGTGAGTGTCGCTGAGG        | 3 | GGGGCAATCTCTGCTGCA          | TGGGGATCTTGTCTGCTGGC       | DMSO                | 3 | 0 | 0 |
| OT3-27   | GGTGAGTCCCTGTCGCTGTTGG      | 3 | ACACACTGGTCTGATTACCA        | CCTGCACAGGCCAGGTGTT        | DMSO                | 2 | 1 | 0 |
| OT3-28   | GTTTCATGAGTGTCGCTGTTGG      | 3 | TGGGACAGTAAACTGCACCA        | CTGCGCCGCTGACTGTAGG        | DMSO                | 0 | 3 | 1 |
| OT3-29   | TGAGTGAGTGTCGCTGTTGG        | 3 | TCAGTGGTCCCTGGCCTGAG        | AGAGCACTGGGTAGCAGTCACT     | DMSO                | 2 | 1 | 0 |
| OT3-30   | TGCCAGTGAGTGTCGCTGTTGG      | 3 | AGACACAGCCAGGGCCTCAG        | GGTGGCGTGTGTGTATCC         | 68C, 3% DMSO        | 1 | 1 | 1 |
| OT3-31   | TGGGTGAGTGTCGCTGTTGG        | 3 | ACACTCTACACAGCACCAA         | GAGAAAGTCAAGGCTGGCGGG      | 72C Anneal, 3% DMSO | 1 | 2 | 0 |
| OT3-32   | TGTATGAGTGTCGCTGTTGG        | 3 | ACTGCCTGATTTCCCGGT          | TGGTGAGGGCTTCAGGGAGC       | DMSO                | 1 | 1 | 1 |
| OT3-33   | TGTGAGAGAGTGTGCTGTTGG       | 3 | GCCAGGTTTACTGACTCCCC        | TCCTTACACATCGGCCGGC        | DMSO                | 2 | 1 | 0 |
| OT3-34   | TGTGCTGAGTGTCGCTGTTGG       | 3 | CGAGGAGCCGAGTTCGTAA         | CTGACCTGGGGCTGTGGTAC       | DMSO                | 1 | 2 | 0 |
| OT3-35   | TGTGAGTGTGTGCTGTTGG         | 3 | TCCTGGGAAGTATGGCTTCA        | GCACTGAGCAACCAGGAGCAC      | DMSO                | 2 | 1 | 0 |
| OT3-36   | AGCGTGTGAGTGTCGCTGGGG       | 4 | Not optimized               |                            |                     | 1 | 0 | 3 |

|          |                          |   |                              |                            |                     |   |   |   |
|----------|--------------------------|---|------------------------------|----------------------------|---------------------|---|---|---|
| OT3-37   | ATTGAGTGTGAGTGCGTGGG     | 4 | TAAACCGTTGCCCGCCTC           | GCTCCCTGCCAGTGAACC         | DMSO                | 2 | 1 | 1 |
| OT3-38   | CATGTGTGGGTGTGCGTGTGG    | 4 | CCTGTGAGACTCCAGGTCC          | CTCGGAGTGGGTGGTATA         | DMSO                | 2 | 0 | 2 |
| OT3-39   | CCCGAGTGTGTGTGCGTGTGG    | 4 | CTCGGGGACTGACAAGCCGG         | GGAGCAGCTCTCCAGGGCC        | DMSO                | 3 | 0 | 1 |
| OT3-40   | CTGGAGTGTGTGTGTGTGG      | 4 | CCCCGACCAAGCAGGAGCA          | CTGGCAGCTCTGGATGGG         | DMSO                | 1 | 2 | 1 |
| OT3-41   | GTTTCATGAGTGTGTGCGTGGG   | 4 | Not optimized                |                            |                     | 0 | 3 | 1 |
| OT3-42   | TATGTGTGGTGTGCGTGTGG     | 4 | ATTTTCAGAGCCCGGGGAAA         | AGGCCGCGGTGTTATGGTTA       | DMSO                | 1 | 2 | 1 |
| OT3-43   | TATGTGTGTGTGTGCGTGGG     | 4 | GCCAGTGGCTTAGTGTCTTGTGT      | TGACATATTTCTGGGCCATGGGT    | DMSO                | 2 | 1 | 1 |
| OT3-44   | TCTGTGTGTGTGTGCGTGGG     | 4 | TGCCAGAAGAACATGGGCCAGA       | CCATGTGACATCATATACTGGGAAGC | DMSO                | 3 | 1 | 0 |
| OT3-45   | TCTGTGTGTGTGTGCGTGTGG    | 4 | GCGTGTCTGTGTGCGTGC           | CCAGGCTGGGCACACAGTTT       | DMSO                | 3 | 1 | 0 |
| OT3-46   | TGAGCGTGAGTGTGAGCGTGG    | 4 | Not optimized                |                            |                     | 2 | 2 | 0 |
| OT3-47   | TGCTTTTGTGTGTGCGTGTGG    | 4 | TGCCAGTCCAATATTTTCAGCAGCT    | AGGATGAGTTCATGTCCTTTGTGGGG | DMSO                | 2 | 2 | 0 |
| OT3-48   | TTTGTGTGTGTGTGCGTGTGG    | 4 | GGGTGAAAATTTGTTACTGTTAGCTGT  | AATGACTATTCCCTGGGTATCCCA   | DMSO                | 2 | 2 | 0 |
| OT3-49   | AAGCGGTGTGTGTGCGTGTGG    | 5 | TGCCCATCAATCACCTCGGC         | CAAGGTCCGCGAGGCGAGTGA      | DMSO                | 1 | 2 | 2 |
| OT3-50   | AATTCGTGTGTGTGCGTGGG     | 5 | GCCTCTTGCCGCTGTTAA           | TGAGAGTCTCCTGGTCCCACT      | DMSO                | 1 | 2 | 2 |
| OT3-51   | ATGGTGTGTGTGTGCGTGTGG    | 5 | Not optimized                |                            |                     | 2 | 2 | 1 |
| OT3-52   | CACGTGTGTGTGTGCGTGTGG    | 5 | GCCACCAAAAATAGCCAGCT         | ACATGCATCTGTGTGCGT         | DMSO                | 3 | 0 | 2 |
| OT3-53   | GAAATTGAGTGTGTGCGTGTGG   | 5 | ACAGACTGACCCTTGA AAAATACCAGT | TGATCTTTTCTGGCAATGGTTTTCCC | DMSO                | 2 | 1 | 2 |
| OT3-54   | TAAAGTGTGTGTGCGTGTGG     | 5 | AGCCAAATTTCTCAACAGCAGCACT    | TCCTGGAGAGCAGGCATTTTGT     | DMSO                | 3 | 1 | 1 |
| OT3-55   | TATATGTGTGTGTGCGTGGG     | 5 | ACCTCTGTGCTGCTGGC            | GGCGGGAAGGTAACCTCGG        | DMSO                | 2 | 1 | 2 |
| OT3-56   | TATCTGTGTGTGTGCGTGTGG    | 5 | CACAAAGCTCTACTTTTCAGTAGTGT   | TGATCCGATGGTGTTCACAGCT     | DMSO                | 3 | 1 | 1 |
| OT3-57   | TTTATGTGTGTGTGCGTGTGG    | 5 | TGTGGGATTACCTGCCTGGC         | ACGCACAAAATGCCTTGCA        | DMSO                | 2 | 2 | 1 |
| OT3-58   | TTTTTGTGTGTGTGCGTGGG     | 5 | TGAGGCGAGCAGTCCAGC           | GCCCCGAGCAGTGTAGGGC        | DMSO                | 2 | 3 | 0 |
| OT3-59   | AAAAATGTGTGTGCGTGGG      | 6 | ATTAGCTGGGCGTGGCGGAG         | ACTGCATCTCATCTCAGGCGCT     | DMSO                | 2 | 1 | 3 |
| OT3-60   | ACAATGTGTGTGTGCGTGTGG    | 6 | TGAAGCAGAAGGAGTGGAGAAGGA     | TCAGCTTACATCTGTTTCAGTTCAGT | DMSO                | 4 | 0 | 2 |
| OT3-61   | ATGTGGTGTGTGTGCGTGTGG    | 6 | TGGTGGAGTGTGTGCGTGGT         | AGAGCAGAAAAGAGAGTCCCA      | DMSO                | 1 | 3 | 2 |
| OT3-62   | CAAAATGTGTGTGCGTGTGG     | 6 | GCCCTGTACGTCTGACAGC          | TGCACAAGCCATAGCCTCTCT      | DMSO                | 3 | 1 | 2 |
| OT3-63   | CCCTGGTGTGTGTGCGTGTGG    | 6 | AGCGCAGGTAACAGGCCCA          | TCTCTGCCCTTTCTTCTGT        | DMSO                | 3 | 1 | 2 |
| OT3-64   | TCCCGTGTGTGTGCGTGGG      | 6 | ATGGGTGCCAGGTACCCAGC         | ACAGCAGGAAGGAGCCGAG        | DMSO                | 2 | 3 | 1 |
| OT3-65   | TCCTCGTGTGTGTGCGTGTGG    | 6 | CGGGCGGTGGACAGATGAG          | AGGAGGTCTGAGCCAGGGG        | DMSO                | 2 | 3 | 1 |
| OT3-66   | TTAAGTGGGTGTGCGTGGG      | 6 | TCAACTAGTGAACAGACCACTGA      | GTCTATACAGCCCAACCTCATGT    | DMSO                | 1 | 2 | 3 |
| OT3-67   | TTATATGTGTGTGCGTGGG      | 6 | GCCAGGGCAGTGGATTCT           | TGTCATTTCTAGTATGTCAGCCGGA  | DMSO                | 2 | 4 | 0 |
| OT3-68   | TTGAGGAGAGTGTGCGTGGG     | 6 | GAGCCCAACGGTTCAGTCC          | GCCAGAGCTACCACCTCGCC       | DMSO                | 1 | 3 | 2 |
| Target 4 | GAGTCCGAGCAGAAGAAGAGGG   | 0 | GGAGCAGCTGGTCAGAGGGG         | GGGAAGGGGGACACTGGGGA       | DMSO                |   |   |   |
| OT4-1    | GAGTTAGAGCAGAAGAAGAGGG   | 2 | TCTCTCTCAACTCATGACCAGCT      | ATCTGCACATGTATGTACAGGAGTCA | DMSO                | 0 | 1 | 1 |
| OT4-2    | AAGTCAGAGGAGAAGAAGAGGG   | 3 | TGGGAATCTCAAAGAACCCCC        | AGGGTGTACTGTGGAACTTTGCA    | DMSO                | 2 | 1 | 1 |
| OT4-3    | AAGTCCGAGGAGAGAAAGAGGG   | 3 | GATGGCCCCACTGAGCACGT         | ACTTCGTAGAGCCTTAAACATGTGGC | DMSO                | 1 | 0 | 2 |
| OT4-4    | AAGTCTGAGCACAAGAAGAATGG  | 3 | AGGATTAATGTTAAAGTCACTGGTGG   | TCAAACAAGGTGCAGATACAGCA    | 1M betaine, TD      | 1 | 0 | 2 |
| OT4-5    | ACGTCTGAGCAGAAGAAGAATGG  | 3 | TCCAAGCAGTGGTTTCTCAGTCA      | TGCTCTGTGGATCATATTTGGGGGA  | DMSO                | 0 | 1 | 2 |
| OT4-6    | GACTCCTAGCAAAGAAGAATGG   | 3 | ACTTTGAGCCTGGGGCAGGT         | CCCAGCTGAAGTCAATGGC        | DMSO                | 1 | 1 | 1 |
| OT4-7    | GAGACTGAGAAAGAAGAAGAGGG  | 3 | CAAAGCATGCCTTTAGCCG          | GGCTCTCGATTGGCACCT         | 1M betaine, TD      | 1 | 1 | 1 |
| OT4-8    | GAGCCGGAGCAGAAGAAGGAGGG  | 3 | Not optimized                |                            |                     | 1 | 0 | 2 |
| OT4-9    | GAGCCTGAGCAGAAGGAGAAAGGG | 3 | GGACTCCCTGCAGTCCAGC          | AGGAACACAGGCCAGGCTGG       | 72C Anneal, 6% DMSO | 0 | 0 | 3 |
| OT4-10   | GAGGCCGAGCAGAAGAAGAGCGG  | 3 | CCCTTAGGCCACTTCCCA           | CCGACCTCATCCCTCCTGG        | DMSO                | 0 | 1 | 2 |
| OT4-11   | GAGTAAGAGAGAAGAAGAAGGG   | 3 | TGATTTGCTTAGAGTCCCAGGT       | TGGGCTGTGTCCCTACCCA        | DMSO                | 0 | 3 | 0 |
| OT4-12   | GAGTAGGAGGAGAAGAAGAAGGG  | 3 | Not optimized                |                            |                     | 2 | 1 | 0 |
| OT4-13   | GAGTCCGGAAGGAGAAGAAGGG   | 3 | AGGCAGGAGAGCAAGCAGGT         | ACCCTGACTACTGACTGACCCT     | DMSO                | 0 | 1 | 2 |
| OT4-14   | GATTCCTACCAAGAAGAAGAGGG  | 3 | CTCCCCATTGCGACCCGAGG         | AGAGGCATTGACTTGGACACT      | DMSO                | 1 | 2 | 0 |
| OT4-15   | GCCGACAGAGCAGAAGAAGAGGG  | 3 | CTGGAGCCAGCAGGAAGGC          | CCTCAGGAGGGGGCCTGAT        | DMSO                | 1 | 2 | 0 |
| OT4-16   | AAATCCAAAGCAGAAGAAGAAGGG | 4 | ACTGTGGCCTTGTCCCA            | AGGTGCGTGCAGGGTTAAGGA      | DMSO                | 1 | 0 | 3 |
| OT4-17   | AAGTCTGAGCACAAGAAGAATGG  | 4 | GGCGTCCCTTTTCCCTTGT          | CGTCACCATCGTCTCGTGG        | DMSO                | 2 | 0 | 2 |
| OT4-18   | AAGTGTGAGCAGGAGAAGAAGGG  | 4 | TGCCATCTATAGCAGCCCT          | GCATCTTGCTAACCTACTTCTTGA   | DMSO                | 1 | 0 | 3 |
| OT4-19   | AATACAGAGCAGAAGAAGAATGG  | 4 | GTGGAGACGCTAACTGTGAGGT       | GCTCCTGGCTCTCTACAGC        | DMSO                | 1 | 2 | 1 |
| OT4-20   | AGGTACTAGCAGAAGAAGAAGGG  | 4 | CCGAACTCTGCTGAGCTTATGC       | CCAAGTCAATGGGAACAAGGGA     | DMSO                | 0 | 2 | 2 |
| OT4-21   | AGGTGCTAGCAGAAGAAGAAGGG  | 4 | Not optimized                |                            |                     | 1 | 1 | 2 |
| OT4-22   | AGGTGGGAGCAGAAGAAGAGGG   | 4 | TGCCCAAGACCTTTCTCC           | ATGGCAGGAGAGGAGGAAG        | DMSO                | 2 | 0 | 2 |
| OT4-23   | CAACCGGAGCAGAAGAAGAAGGG  | 4 | GGGTGGGGCCTTTGTGGGT          | CTGGGCCAGGTTTCTGCC         | DMSO                | 3 | 0 | 1 |
| OT4-24   | CACCTGTGAGAGAAGAAGAAGGG  | 4 | TGGAGAACATGAGAGCTTGA         | TCCTCTGTAGGCAATGGGAACA     | DMSO                | 3 | 0 | 1 |
| OT4-25   | CAGTCATGCGAGAAGAAGAAGGG  | 4 | GCCACATGGTAGAAGTCCGC         | GGCAGATTTCCCATGCTG         | 1M betaine, TD      | 1 | 2 | 1 |
| OT4-26   | CCGTCCAGCAGTAGAAGAATGG   | 4 | TGTACACCCCAAGTCCCTCC         | AAGGGAGTGTCAAGCCTC         | DMSO                | 3 | 1 | 0 |
| OT4-27   | GTCTGCGATCAGAAGAAGAAGGG  | 4 | AGGTCTGGCTAGAGATGCAGCA       | AGTCCAACACTCAGGTGAGACCCT   | DMSO                | 3 | 1 | 0 |
| OT4-28   | TAATCCAATCAGAAGAAGAAGGG  | 4 | CCAAGAGACCCAGCTGTTGGA        | GGGTATGGAATTCTGATTAGCAGAGC | DMSO                | 0 | 2 | 2 |
| OT4-29   | TATACGGAGCAGAAGAAGAATGG  | 4 | ACCATCTCTTATTGATGATCCCAA     | ACACTGTGAGTATGCTTGGCT      | DMSO                | 2 | 2 | 0 |
| OT4-30   | ACTTCCCTGCAGAAGAAGAAGGG  | 5 | GGCTGCGGGGAGATGAGCTC         | TGCGATGCTTTCCACAGGGC       | DMSO                | 2 | 2 | 1 |
| OT4-31   | AGGACTGGGAGAAGAAGAAGGG   | 5 | TCTTCCAGGAGGCGAGCTCC         | CCAATCTGAGCTCCTACAAGGT     | DMSO                | 1 | 0 | 4 |
| OT4-32   | AGGTGGGAGAAGAAGAAGGG     | 5 | GAGCTGCATGGATGGCACT          | TGCTGGTTAAGGGGTGTTTGG      | DMSO                | 1 | 1 | 3 |
| OT4-33   | AGTTCAGAGCAGGAGAAGAATGG  | 5 | TCTGGGAAGGTGAGGAGGCCA        | TGGGGGACAATGGAAAAGCAATGA   | DMSO                | 0 | 2 | 3 |
| OT4-34   | ATGACACAGCAGAAGAAGAAGGG  | 5 | CTTGCTCCAGCTGACCC            | AGCCCTTGCCTGCAAGGAC        | DMSO                | 3 | 1 | 1 |
| OT4-35   | ATGACAGAGAAGAAGAAGAAGGG  | 5 | GGGATTTTATCTGTGGTGCGAA       | AACCACAGATGATACCCTAAAGCT   | DMSO                | 2 | 2 | 1 |
| OT4-36   | CCGCCCTGCAGAAGAAGACGG    | 5 | ACCCATCAGGACCGCAGCAC         | TCTGGAACCTGGGAGGCGGA       | 72C Anneal, 3% DMSO | 3 | 1 | 1 |
| OT4-37   | GCAGGAGAGCAGAAGAAGAAGGG  | 5 | CGTCCCTCACAGCCAGCCTC         | CCTCTTGGCCCTGGGGTTC        | DMSO                | 1 | 3 | 1 |
| OT4-38   | GTTCAGAGCAGAAGAAGAATGG   | 5 | CCCTCTGCAAGGTGAGTCTCC        | AGATGTTCTGTCACAGGCT        | DMSO                | 1 | 3 | 1 |
| OT4-39   | GTTTGAAGCAGAAGAAGAAGGG   | 5 | GGCTTCACTGCTGAAGGCT          | TGCCGCTCACATACCCTCC        | DMSO                | 2 | 1 | 2 |
| OT4-40   | TATGGCAAGCAGAAGAAGAAGGG  | 5 | AGCATTGCTGTGGGTGATGT         | AGCACCTATTGACACTGGTCTCT    | DMSO                | 1 | 3 | 1 |
| OT4-41   | TGGTGGGATCAGAAGAAGAAGGG  | 5 | TCTAGAGCAGGGGGCACAATGC       | TGGAGATGGAGCCTGGTGGGA      | DMSO                | 2 | 2 | 1 |
| OT4-42   | ACCCACGGCAGAAGAAGAAGGG   | 6 | GGTCTCAGAAAATGGAGAGAAGCACG   | CCCACAGAAACCTGGCCCT        | DMSO                | 1 | 2 | 3 |
| OT4-43   | ACTCCTGATCAGAAGAAGAAGGG  | 6 | GGTGTGATACAAAACGTTGCCT       | TGGGTCTCTCCACTGTGCA        | DMSO                | 0 | 3 | 3 |

|          |                          |   |                                                                             |                               |                                |                     |       |       |       |
|----------|--------------------------|---|-----------------------------------------------------------------------------|-------------------------------|--------------------------------|---------------------|-------|-------|-------|
| OT4-44   | ACTGATGAGCAGAAGAAGAAAGG  | 6 |                                                                             | ACTCTCTTAAGTACTGATATGGCTGT    | CAGAATCTGTCTGTGCCCA            | DMSO                | 0     | 4     | 2     |
| OT4-45   | ATTTTAGTGCAGAAGAAGAAAGG  | 6 |                                                                             | Not optimized                 |                                |                     | 2     | 2     | 2     |
| OT4-46   | ATTTTAGTGCAGAAGAAGAAAGG  | 6 |                                                                             | Not optimized                 |                                |                     | 2     | 2     | 2     |
| OT4-47   | CCATGGCAGCAGAAGAAGAAAGG  | 6 |                                                                             | CAATGCCTGCAGTCTCAGGA          | TCCCAAGAGAAAACCTGTCTGACA       | DMSO                | 4     | 1     | 1     |
| OT4-48   | CCATTACAGCAGAAGAAGAAAGG  | 6 |                                                                             | GCATTGGCTGCCAGGAAAA           | TGGCTGTCTGGGCTGTGTT            | DMSO                | 2     | 2     | 2     |
| OT4-49   | CGAGGCGGCAGAAGAAGAAAGG   | 6 |                                                                             | CCACAAGCTCAGCTACCCG           | ACAGGTGCCAAAACACTGCCT          | DMSO                | 2     | 1     | 3     |
|          |                          |   | TCATTGCAGCAGAAGAAGAAAGG<br>TCATTGTAGCAGAAGAAGAAAGG                          |                               |                                |                     |       |       |       |
| OT4-50   | TCATTGCAGCAGAAGAAGAAAGG  | 6 |                                                                             | GCCTCTGCAAATGAGACTCCTTT       | CGATCAGTCCCCGGCTCC             | DMSO                | 2 / 1 | 2 / 3 | 2     |
| OT4-51   | TCTCCAGGCAGAAGAAGAAAGG   | 6 |                                                                             | TCCAGAATCTGCCTCCGCA           | AGGGTTTTCCAGGCACATGGG          | DMSO                | 0     | 4     | 2     |
| Target 5 | GTCATCTTAGTCATTACCTGAGG  | 0 |                                                                             | TCCTAAAAATCAGTTTTGAGATTACTTCC | AAAGTGTTAGCCAACATACAGAAGTCAGGA | DMSO                |       |       |       |
|          |                          |   | GGTATCTAAGTCATTACCTGTGG<br>GGTATCTAAGTCAATACCTGTGG                          |                               |                                |                     |       |       |       |
| OT5-1    | GGTATCTAAGTCATTACCTGTGG  | 3 |                                                                             | ACATCTGGGGAAAGCAAAGTCAACA     | TGTCTGAGTATCTAGGCTAAAAGTGGT    | DMSO                | 1 / 2 | 1     | 1     |
| OT5-2    | GTAATAATTAGTCATTACCGTGG  | 3 |                                                                             | ACGATCTTGCTCTATTTCCCTGTACA    | AGTGCTTTGTGAACGTAAAAAGCAAACA   | DMSO                | 0     | 3     | 0     |
| OT5-3    | GTAATCTGAGTCATTTCCCTGGGG | 3 |                                                                             | GCACCTTGGTGCTGCTAAATGCC       | GGGCAACTGAACAGGCATGAATGG       | DMSO                | 1     | 2     | 0     |
| OT5-4    | GTCATCTAGTCATTACTGAGG    | 3 |                                                                             | AACTGTCTGCTATCCCGCC           | GGTGACCTGGATCCACCCA            | DMSO                | 1     | 1     | 1     |
| OT5-5    | GTCATCTAGTCATTACTGAGG    | 3 |                                                                             | Not optimized                 |                                |                     | 1     | 1     | 1     |
| OT5-6    | GTCATCTGAGGCATTACTGAGG   | 3 |                                                                             | CATCACCTCCACCAGGCC            | ACCACTGTGCAGGCTCCAG            | 72C Anneal, 3% DMSO | 0     | 3     | 0     |
| OT5-7    | AATATGTTAGTCATTACCTGAGG  | 4 |                                                                             | Not optimized                 |                                |                     | 2     | 0     | 2     |
| OT5-8    | ATAAACGTTAGTCATTACCTGAGG | 4 |                                                                             | CCTGACCCGTGGTCCCGAC           | TGGTGCGTGGTGTGTGGT             | 72C Anneal, 3% DMSO | 1     | 2     | 1     |
| OT5-9    | ATCATCATCGTCATTACTGAGG   | 4 |                                                                             | TGGGAACATTGGAGAAAGTTTCTGA     | CCATGTGACTACTGGGCTGCC          | DMSO                | 1     | 1     | 2     |
| OT5-10   | ATCATTTTACTCATTACTTGTGG  | 4 |                                                                             | AGCCTTGGCAAGCACTCCCT          | GGTTCTCTCTCAGAAAAGAAAGAGG      | DMSO                | 1     | 0     | 3     |
| OT5-11   | ATCATTTTACTCATTACTTGTGG  | 4 |                                                                             | GGCAGCGGACTTCAGAGCCA          | GCCAGAGGCTCTCAGCACTGC          | DMSO                | 1     | 0     | 3     |
| OT5-12   | CACAGCTTAGTCATTACCTGAGG  | 4 |                                                                             | CCAGCCTGGTCAATATGGCA          | ACTGTGCCAGCCCCATATT            | DMSO                | 2     | 1     | 1     |
| OT5-13   | CCCAGCTTAGTCATTACTGAGG   | 4 |                                                                             | ATGCCAACACTCGAGGGGCC          | CGGGTTGTGGACCGGGTTA            | DMSO                | 2     | 1     | 1     |
| OT5-14   | CTCACCTTAGTCATTACTGAGG   | 4 |                                                                             | TTGCTTAGTGGGGAGGGGG           | AGAGTTGAGGCATGAAAAGAAAGCAACA   | DMSO                | 3     | 0     | 1     |
| OT5-15   | CTCATTTTACTCATTACTTGTGG  | 4 |                                                                             | AGCTGAAGTAGCAGTGTTAAGCCT      | TGCAATTTGAGGGGCTCTCTTCA        | DMSO                | 1     | 1     | 2     |
| OT5-16   | CTCTCCCTTAGTCATTACTGAGG  | 4 |                                                                             | AGTCACTGGAGTAAAGCCCT          | TGCCAGCAAAGTTGTTAGTGTGT        | DMSO                | 2     | 0     | 2     |
| OT5-17   | CTTATCTCTGTCATTACTGAGG   | 4 |                                                                             | GGGTCTCCCTCAGTGCCTG           | TGTGTGGTGGGAGCAAAACGACA        | DMSO                | 2     | 0     | 2     |
| OT5-18   | GACAGCTCCGTCACTACCTGAGG  | 4 |                                                                             | TGGGGCTGTTAAGAGGCACA          | TGACCAACACACCCCCCAG            | DMSO                | 1     | 2     | 1     |
| OT5-19   | GCCACCTCAGTCATTACTGAGG   | 4 |                                                                             | TCAAAACAGATTGACCAAGGCCAAAT    | TGTGTTTTTAAAGTGCACCCGAG        | DMSO                | 1     | 0     | 3     |
| OT5-20   | GGAATCTTAGTCATTACTGAGG   | 4 |                                                                             | TCTGGCACCAGGACTGATTGACA       | GCACGCAGCTGACTCCAG             | DMSO                | 1     | 2     | 1     |
| OT5-21   | GTCCTCAGTCATTACTGAGG     | 4 |                                                                             | Not optimized                 |                                |                     | 1     | 0     | 3     |
| OT5-22   | GTGTCTTAGTCATTACTGAGG    | 4 |                                                                             | AGCATCTGTGATACCTACCTGTCT      | ACCAGGCTGCCACAGAGTC            | DMSO                | 1     | 0     | 3     |
| OT5-23   | TACATCTTAGTCATTACTGAGG   | 4 |                                                                             | TAGTCTGTGGCCAGGCTG            | CTGGCCCCGAGAGTTTCA             | DMSO                | 1     | 2     | 1     |
|          |                          |   | TCCATCTCATTACTGAGG<br>TCCATCTCATTACTGAGT                                    |                               |                                |                     |       |       |       |
| OT5-24   | TCCATCTCATTACTGAGG       | 4 |                                                                             | CTGCAACAGGGCCCTTACC           | GAGCAGCAGCAAAGCCACCG           | DMSO                | 1     | 1     | 2     |
| OT5-25   | TTCATCTAGTCAACACCTGAGG   | 4 |                                                                             | GCCTGGAGAGCAAGCCTGGG          | AGCCGAGACAATCTGCCCG            | DMSO                | 1     | 1     | 2     |
| OT5-26   | TTTATAATTAGTCATTACTGAGG  | 4 |                                                                             | AGTGAAACAACAAGCAGCAGTCTGA     | GGCAGGCTGACCAGTGGGG            | No DMSO TD          | 1     | 2     | 1     |
| OT5-27   | AACGTGTAGTCATTACTGAGG    | 5 |                                                                             | AGGCTCAGAGGTAAGCAATGGA        | TGAGTAGACAGAAATGTTACCGGTGT     | DMSO                | 3     | 0     | 2     |
| OT5-28   | AAGATCACAGTCATTACTGAGG   | 5 |                                                                             | TCAGAGATGTTAAAGCCTGTTGGG      | AGTGAACCAAGGAAATGGGGGA         | DMSO                | 3     | 0     | 2     |
| OT5-29   | AGAATATTAGTCATTACTGAGG   | 5 |                                                                             | TGTCTTTCTGGGTTAGTGGA          | CACCTCAGCCCTGTAGCTGG           | DMSO                | 0     | 4     | 1     |
| OT5-30   | AGCAGATTAGTCATTACTGAGG   | 5 |                                                                             | CCATTGGGTGACTGAATGCACA        | GCCACTGTCCCAGCCTATT            | 1M betaine, TD      | 1     | 3     | 1     |
| OT5-31   | AGTAGCTTAGTCATTACTGAGG   | 5 |                                                                             | ACCAAGAAAGTGAAGAAGGAAACCC     | TGAGATGGCATAACGATTTACCCA       | DMSO                | 1     | 2     | 2     |
| OT5-32   | CACGGCTTAGTCATTACTGAGG   | 5 |                                                                             | AGGGTGGGACTGAAAGGAGCT         | TGGCATCACTCAGAGATTGGAACA       | DMSO                | 3     | 1     | 1     |
| OT5-33   | CATATGTTAGTCATTACTGAGG   | 5 |                                                                             | ACCAGTGCTGTGACCTTGG           | TCCTATGGGAGGGGAGGCTTCT         | DMSO                | 3     | 1     | 1     |
| OT5-34   | CATTCTTAGTCATTACTGAGG    | 5 |                                                                             | CCAGGTGGTGGTTTATGAC           | GCATACGCGCAGTAGAATGAGCC        | 68C, 3% DMSO        | 4     | 0     | 1     |
| OT5-35   | TGCAGCTAGTCATTACTGAGG    | 5 |                                                                             | CAGGCGCTGGTCTTAGCCT           | CCTTCTGGGCCCCATGGT             | DMSO                | 2     | 3     | 0     |
| OT5-36   | TTGCTTTTAGTCATTACTGAGG   | 5 |                                                                             | TGGGTCCAAGATGTTCCCT           | TGAAACTGCTTAGGAGGTGTTGG        | DMSO                | 1     | 2     | 2     |
| OT5-37   | AACCTGAAAGTCATTACTGAGG   | 6 |                                                                             | GCTGGGCTGGTGGTATATGC          | ACTTGAACAAGCTGATAACTGACTGA     | DMSO                | 5     | 0     | 1     |
| OT5-38   | AAGGTACAGTCATTACTGAGG    | 6 |                                                                             | AGTTGGTCTCAGTGAATGGGA         | CGCAGCGCAGGATTCATCA            | DMSO                | 3     | 0     | 3     |
| OT5-39   | AATGTCTTAGTCATTACTGAGG   | 6 |                                                                             | AGAGGAGGCACAATTAACCCCT        | GGCTGGGAGGCTCACAAT             | DMSO                | 1     | 1     | 4     |
| OT5-40   | AGATGCTTAGTCATTACTGAGG   | 6 |                                                                             | GGGAAAGTTGGGAAAGTCAGCA        | AGGACAAGCTACCCACAC             | DMSO                | 1     | 3     | 2     |
| OT5-41   | AGTAGATTAGTCATTACTGAGG   | 6 |                                                                             | TGGTGCATCAAAGGGTGGTCT         | TCATCCAGCAGCGGGGAG             | DMSO                | 0     | 3     | 3     |
| OT5-42   | AGTAGGTTAGTCATTACTGAGG   | 6 |                                                                             | CCCAGGCTGCCATCACACT           | TGGAGTAAATACCTGGGGACCT         | DMSO                | 1     | 3     | 2     |
| OT5-43   | CAAATGAGAGTCATTACTGAGG   | 6 |                                                                             | TCAGTGCCTGGGCTCCTCA           | TGTGCAAACTAGCACGGTGC           | DMSO                | 4     | 2     | 0     |
| OT5-44   | CATGCTTAGTCATTACTGAGG    | 6 |                                                                             | AGCACTCCCTTTGAAATTTGGTCT      | ACTGAAGTCCAGCCTTCCATTCA        | DMSO                | 2     | 1     | 3     |
| OT5-45   | CCTGACTTAGTCATTACTGAGG   | 6 |                                                                             | GAAACGGTCCCTGGTCCA            | GGGGAGTAGAGGTAGTGTGCC          | DMSO                | 2     | 0     | 4     |
| OT5-46   | CGTGCAATTAGTCATTACTGAGG  | 6 |                                                                             | TTGGGGTCCCTGTGGAGTC           | AGTGGCGGTTGTGCCAA              | DMSO                | 1     | 2     | 3     |
| Target 6 | GGAATCCCTTCTGCAGCACCTGG  | 0 |                                                                             | GCCCTACATCTGCTCTCCCTCCA       | GGGCCGGGAAAGAGTTGCTG           | DMSO                |       |       |       |
| OT6-1    | GGAACCCCTTCTGCAGCACCGG   | 2 |                                                                             | TTGGAGTGTGGCCCGGTTG           | ACCTCTTTTCTGCTCACTGT           | DMSO                | 0     | 1     | 1     |
| OT6-2    | GGAACCCCTTCTGCAGCTCCAGG  | 3 |                                                                             | CACACCATGCTGATCCAGGC          | GCAGTACGGAAAGCACGAAGC          | DMSO                | 1     | 1     | 1     |
| OT6-3    | GGAAGCTTCTGCAGCACCTGG    | 3 |                                                                             | CTCCAGGGCTGCTGTTCCAC          | CTGGGCTCTGCTGTTCCCG            | DMSO                | 0     | 2     | 1     |
| OT6-4    | GGAATATCTTCTGCAGCCCCAGG  | 3 |                                                                             | CTGTGGTAGCCGTGGCCAGG          | CCCCATACCACCTCTCCGGGA          | DMSO                | 0     | 2     | 1     |
| OT6-5    | GGAATCACCCTTACAGCACCGG   | 3 |                                                                             | GGTGGCGGACTGAAATGAG           | CCAGCGTGTTCGAAGGAT             | 1M betaine, TD      | 0     | 1     | 2     |
|          |                          |   | GGAATCCCTTCTGCAGCCCCTGG<br>GGAATCCCTTCTGCAGCTCTGG<br>GGAATCTTCTTCTGCGATCTGG |                               |                                |                     |       |       |       |
| OT6-6    | GGAATCCCTTCTGCAGCCCCTGG  | 3 |                                                                             | CCAGAGGTGGGGCCCTGTGA          | TTTTCACTCAGTTCGAGGA            | DMSO                | 1     | 1     | 1 / 2 |
| OT6-7    | GGAATCTTCTTCTGCAGCTCTGG  | 3 |                                                                             | TGTGACTGGTGTCTGCTTTTCT        | GCAGTGTGTTGTGATGGGCA           | 1M betaine, TD      | 0     | 1     | 5     |
| OT6-8    | GGAATGCTTCTGCAGGCCAGG    | 3 |                                                                             | CTGGCAAGGGGTGAGTGGG           | TGGGACCCAGCAGCAATG             | DMSO                | 1     | 0     | 2     |
| OT6-9    | GGACTCCCTTCTGCAGCACCTGG  | 3 |                                                                             | ACGGTGTGCTGGCTGCTTCT          | ACAGTCTGACCGTCTGGG             | DMSO                | 1     | 1     | 1     |
| OT6-10   | GGAGTCCCTTCTGCAGCACCGG   | 3 |                                                                             | TGGTTTGGGCTCAGGGATGG          | TGCCTCCACAAAATGTCTACT          | DMSO                | 0     | 0     | 3     |
| OT6-11   | GGAGTCCCTTCTGCAGCACCGG   | 3 |                                                                             | TGGTTTGGGCTCAGGGATGG          | ACCCCTTATCCAGAACCCATGA         | DMSO                | 0     | 0     | 3     |
| OT6-12   | GGCATCCATTTCTGCAGCCCCTGG | 3 |                                                                             | TCCAAGTCAGGATGAGGGCT          | TGGGAGCTGTTCTTTTGGCCA          | DMSO                | 0     | 3     | 0     |
| OT6-13   | GGCTTCCCTTCTGCAGCCCCAGG  | 3 |                                                                             | CACCCCTCAGCTTCCCAA            | GCTAGAGGGTCTGCTGCTCT           | DMSO                | 1     | 2     | 0     |
| OT6-14   | TGAATCCCATCTGCAGCACCGG   | 3 |                                                                             | AGACCCCTTGGCAAGCACA           | CTTGCTTACCCTCGCTCC             | DMSO                | 2     | 1     | 0     |
| OT6-15   | AAAATACCTTCTGCAGTACCAGG  | 4 |                                                                             | ACATGTGGGAGGGGACAGA           | TCTACTTGTGTTACCGATGTGC         | DMSO                | 0     | 1     | 3     |

|        |                          |   |                         |                             |                            |                     |       |   |   |
|--------|--------------------------|---|-------------------------|-----------------------------|----------------------------|---------------------|-------|---|---|
| OT6-16 | AAAATCCCTTCTCAACACCTGG   | 4 |                         | GGACGACTGTCCTGGGACA         | AGTGCCAGAGTGTGTAAGTCT      | 72C Anneal, 3% DMSO | 0     | 1 | 3 |
| OT6-17 | ACACTCCCTCCTGCAGCACCTGG  | 4 |                         | GGAGAGCTCAGCCGAGGTC         | CAGCGTGGCCCGTGGGAATA       | DMSO                | 1     | 1 | 2 |
| OT6-18 | ACCATCCCTCCTGCAGCACCAAGG | 4 |                         | GCTGAAGTGTCTGGGGTGCT        | ACCCCACTGGATGAATTGGTACC    | DMSO                | 1     | 1 | 2 |
| OT6-19 | AGAGGCCCTCTGCAGCACCAAGG  | 4 |                         | TCGGGGTGCACATGGCCATC        | TTGCCTCGAGGGGAAGCAG        | DMSO                | 0     | 1 | 3 |
| OT6-20 | AGGATCCCTGTGCAGCTCCTGG   | 4 |                         | CTCGTGGGAGGCCAACACT         | AGCCACCAACACATACCAGGCT     | DMSO                | 2     | 0 | 2 |
| OT6-21 | CCACTCCTTCTGCAGCACCCGG   | 4 |                         | GCATGCCTTAAATCCCGCT         | AGGATTTAGAGTGTGGGGCT       | DMSO                | 2     | 1 | 1 |
| OT6-22 | GAAGGCCCTCAGCAGCACCTGG   | 4 |                         | CGCCAGCCACAAGTGCA           | GCAAATTTCTGCACCTACTTAGGCCT | DMSO                | 1     | 1 | 2 |
| OT6-23 | GATATCCCTTCTGTATCACCTGG  | 4 |                         | AGCTCACAGAATTGGAGGTAACAGT   | GCAGTACCCTTCACTGCCTGT      | DMSO                | 1     | 1 | 2 |
| OT6-24 | GGTCCCTTCTGCAGCACCTGG    | 4 |                         | AAACTGGGCTGGGCTTCCGG        | GGGGCTAAGGCATTGTGAGACCC    | DMSO                | 2     | 0 | 2 |
| OT6-25 | GTCTCCCTTCTGCAGCACCAAGG  | 4 |                         | GCAGGTAGGCAGTCTGGGGC        | TCTCCTGCCTCAGCCTCCCA       | 1M betaine, TD      | 1     | 2 | 1 |
| OT6-26 | GTCTCCCTTCTGCAGCACCAAGG  | 4 |                         | GCAGGTAGGCAGTCTGGGGC        | TCTCCTGCCTCAGCCTCCCA       | 1M betaine, TD      | 1     | 2 | 1 |
| OT6-27 | GTCTCCCTTCTGCAGCACCAAGG  | 4 |                         | GCAGGTAGGCAGTCTGGGGC        | TCTCCTGCCTCAGCCTCCCA       | 1M betaine, TD      | 1     | 2 | 1 |
| OT6-28 | TCATTCCTTCTGCAGCACCCGG   | 4 |                         | GCTCTGGGTAGAAGGAGGC         | GGCCTGTCAACCAACCAACC       | DMSO                | 2     | 2 | 0 |
| OT6-29 | TGCACCCCTCCTGCAGCACCAAGG | 4 |                         | TGACATGTTGTGTGCTGGGC        | AAATCCTGCAGCCTCCCTT        | DMSO                | 0     | 2 | 2 |
| OT6-30 | TGCATACCTTCTGCAGCACCAAGG | 4 |                         | TCCTGGTGAAGTGTCCACAGGA      | TCCTCCCACTCAGCCTCCC        | DMSO                | 0     | 3 | 1 |
| OT6-31 | TGCATGGCTTCTGCAGCACCAAGG | 4 |                         | TCCTAATCCAAGTCTTTGTTACAGACA | AGGGACCAAGCACTACCTTCA      | DMSO                | 2     | 2 | 0 |
| OT6-32 | AATATTCCTTCTGCAGCACCAAGG | 5 |                         | GGGACACCAAGTCTTCCAT         | GGGGGAGATTGGAGTTCCCC       | DMSO                | 1     | 0 | 4 |
| OT6-33 | ACCATTCTTCTGCAGCACCTGG   | 5 |                         | ACACCACTATCAAGGCAGAGTAGGT   | TCTGCCTGGGGTCTTTCCC        | DMSO                | 1     | 1 | 3 |
| OT6-34 | AGCTCCCTTCTGCAGCACCCGG   | 5 |                         | CTGGGAGCGGAGGGAAAGTGC       | GCCCCGACAGATGAGGCCTC       | DMSO                | 1     | 2 | 2 |
| OT6-35 | CAGATTCCTGCTGCAGCACCCGG  | 5 | CAGATTA                 | CGGGTCTCGGAATGCCTCCA        | ACCCAGGAATTGCCACCCCC       | DMSO                | 1     | 2 | 3 |
| OT6-36 | CCAAGAGCTTCTGCAGCACCTGG  | 5 |                         | TTGCTGTGGTCCCGGTGGTG        | GCAGACACTAGAGCCCGCCC       | DMSO                | 3     | 2 | 0 |
| OT6-37 | CCCAGCCCTGCTGCAGCACCCGG  | 5 |                         | GGTGTGGTGACAGGTCGGGT        | ACCTGCGTCTCTGTGCTGCA       | DMSO                | 2     | 3 | 0 |
| OT6-38 | CCCCCTCCTCCTGCAGCACCCGG  | 5 |                         | CTCCAGGACAGTCTCGGC          | CCTGGCCCATGCTGCCTG         | DMSO                | 2     | 2 | 1 |
| OT6-39 | CTACTGACTTCTGCAGCACCTGG  | 5 |                         | TGCGTAGGTTTTGCCTCTGTGA      | AGGGAATGATGTTTTCCACCCCT    | DMSO                | 2     | 3 | 0 |
| OT6-40 | CTCCTCCCTCCTGCAGCACCTGG  | 5 |                         | CTCCGACGCCACCGTTGGTA        | TGCATTGACGTACGATGGCTCA     | DMSO                | 1     | 3 | 1 |
| OT6-41 | TCTGTCCCTCCTGCAGCACCTGG  | 5 |                         | ACCTGCAGCATGAACTCTGCA       | ACCTGAGCAACATGACTCACCTGG   | DMSO                | 2     | 1 | 2 |
| OT6-42 | ACACAAACTTCTGCAGCACCTGG  | 6 | ACACAAACTTCTGCAGCACCTGG | TCTCCAGTTTCTGTCTCATGG       | ACCATTGGTGAACCCAGTCA       | 1M betaine, TD      | 3 / 2 | 3 | 1 |
| OT6-43 | ACTGTCAATTTCTGCAGCACCTGG | 6 | ACACAAACTTCTGCAGCACCTGG | TGGGGTGGTGTCTTGAATCCA       | TCAGTATAAACCCTGGACTGTGCT   | DMSO                | 2     | 1 | 3 |
| OT6-44 | ACTTTATCTTCTGCAGCACCTGG  | 6 |                         | AGCAGCCAGTCCAGTGTCTG        | CCCTTTCATCGAGAACCACAGGG    | DMSO                | 3     | 1 | 2 |
| OT6-45 | ATCCTTTCTTCTGCAGCACCTGG  | 6 |                         | TGGACGCTGTGGGAGGAGA         | GAGGTCTCGGGTGTCTGCTG       | DMSO                | 0     | 3 | 3 |
| OT6-46 | CACCAACCTTCTGCAGCACCAAGG | 6 |                         | AGGTTTGCACCTGTGTTGCCTGG     | TGGGGTGATTGGTTGCCAGGT      | DMSO                | 3     | 2 | 1 |
| OT6-47 | CATGTGGCTTCTGCAGCACCTGG  | 6 |                         | TCTTCTTTGCCAGGCAGCACA       | TGCAGGAATAGCAGGTATGAGGAGT  | DMSO                | 4     | 0 | 2 |
| OT6-48 | CATTTTCTTCTGCAGCACCTGG   | 6 |                         | GGACGCTACTGCCTGGACC         | GCCCTGGCAGCCCATGGTAC       | DMSO                | 3     | 0 | 3 |
| OT6-49 | CTCTGTCTTCTGCAGCACCTGG   | 6 |                         | AGGCAGTCAATCGCTTGCTA        | GGTCCACCTTCCCTACAA         | DMSO                | 2     | 3 | 1 |
| OT6-50 | CTGTACCCTCCTGCAGCACCAAGG | 6 |                         | Not optimized               |                            |                     | 3     | 1 | 2 |
| OT6-51 | TTGAGGCCCTTCTGCAGCACCCGG | 6 |                         | CCCCAGCCCCACCAAGTTTC        | CAGCCAGGCCACAGCTTCA        | DMSO                | 1     | 4 | 1 |
